# Supplementary material for: Structural basis for dimerization of a paramyxovirus polymerase complex
Source: PubMed Central journal article supplement (PMC11009304; doi:10.1038/s41467-024-47470-7), 2024-04-11
Supplement: 41467_2024_47470_MOESM1_ESM.pdf [file 41467_2024_47470_MOESM1_ESM.pdf]

## SUPPLEMENTARY INFORMATION

# Structural basis for dimerization of a paramyxovirus polymerase complex

Jin Xie<sup>1,6</sup>, Mohamed Ouizougun-Oubari<sup>2,6</sup>, Li Wang<sup>3,6</sup>, Guanglei Zhai<sup>1</sup>, Daitze Wu<sup>3</sup>, Zhaohu Lin<sup>1</sup>, Manfu Wang<sup>4</sup>, Barbara Ludeke<sup>2</sup>, Xiaodong Yan<sup>4</sup>, Tobias Nilsson<sup>5</sup>, Lu Gao<sup>3,\*</sup>, Xinyi Huang<sup>1,\*</sup>, Rachel Fearn<sup>2,\*</sup>, Shuai Chen<sup>1,\*</sup>

<sup>1</sup>Roche Pharma Research and Early Development, Lead Discovery, Roche Innovation Center Shanghai, Shanghai 201203, China.

<sup>2</sup>Department of Virology, Immunology & Microbiology, Boston University Chobanian & Avedisian School of Medicine, Boston, MA 02118, USA.

<sup>3</sup>Roche Pharma Research and Early Development, Infectious Diseases, Roche Innovation Center Shanghai, Shanghai 201203, China.

<sup>4</sup>Wuxi Biortus Biosciences Co. Ltd., Jiangyin, Jiangsu 214437, China.

<sup>5</sup>Roche Pharma Research and Early Development, Infectious Diseases, Roche Innovation Center Basel, Basel 4070, Switzerland.

<sup>6</sup>These authors contributed equally: Jin Xie, Mohamed Ouizougun-Oubari and Li Wang.

\*Corresponding author. Email: goodlucksept2016@yahoo.com (L.G.); xinyi.huang@roche.com (X.H.); rfearn@bu.edu (R.F.); shuai.chen.sc1@roche.com (S.C.).

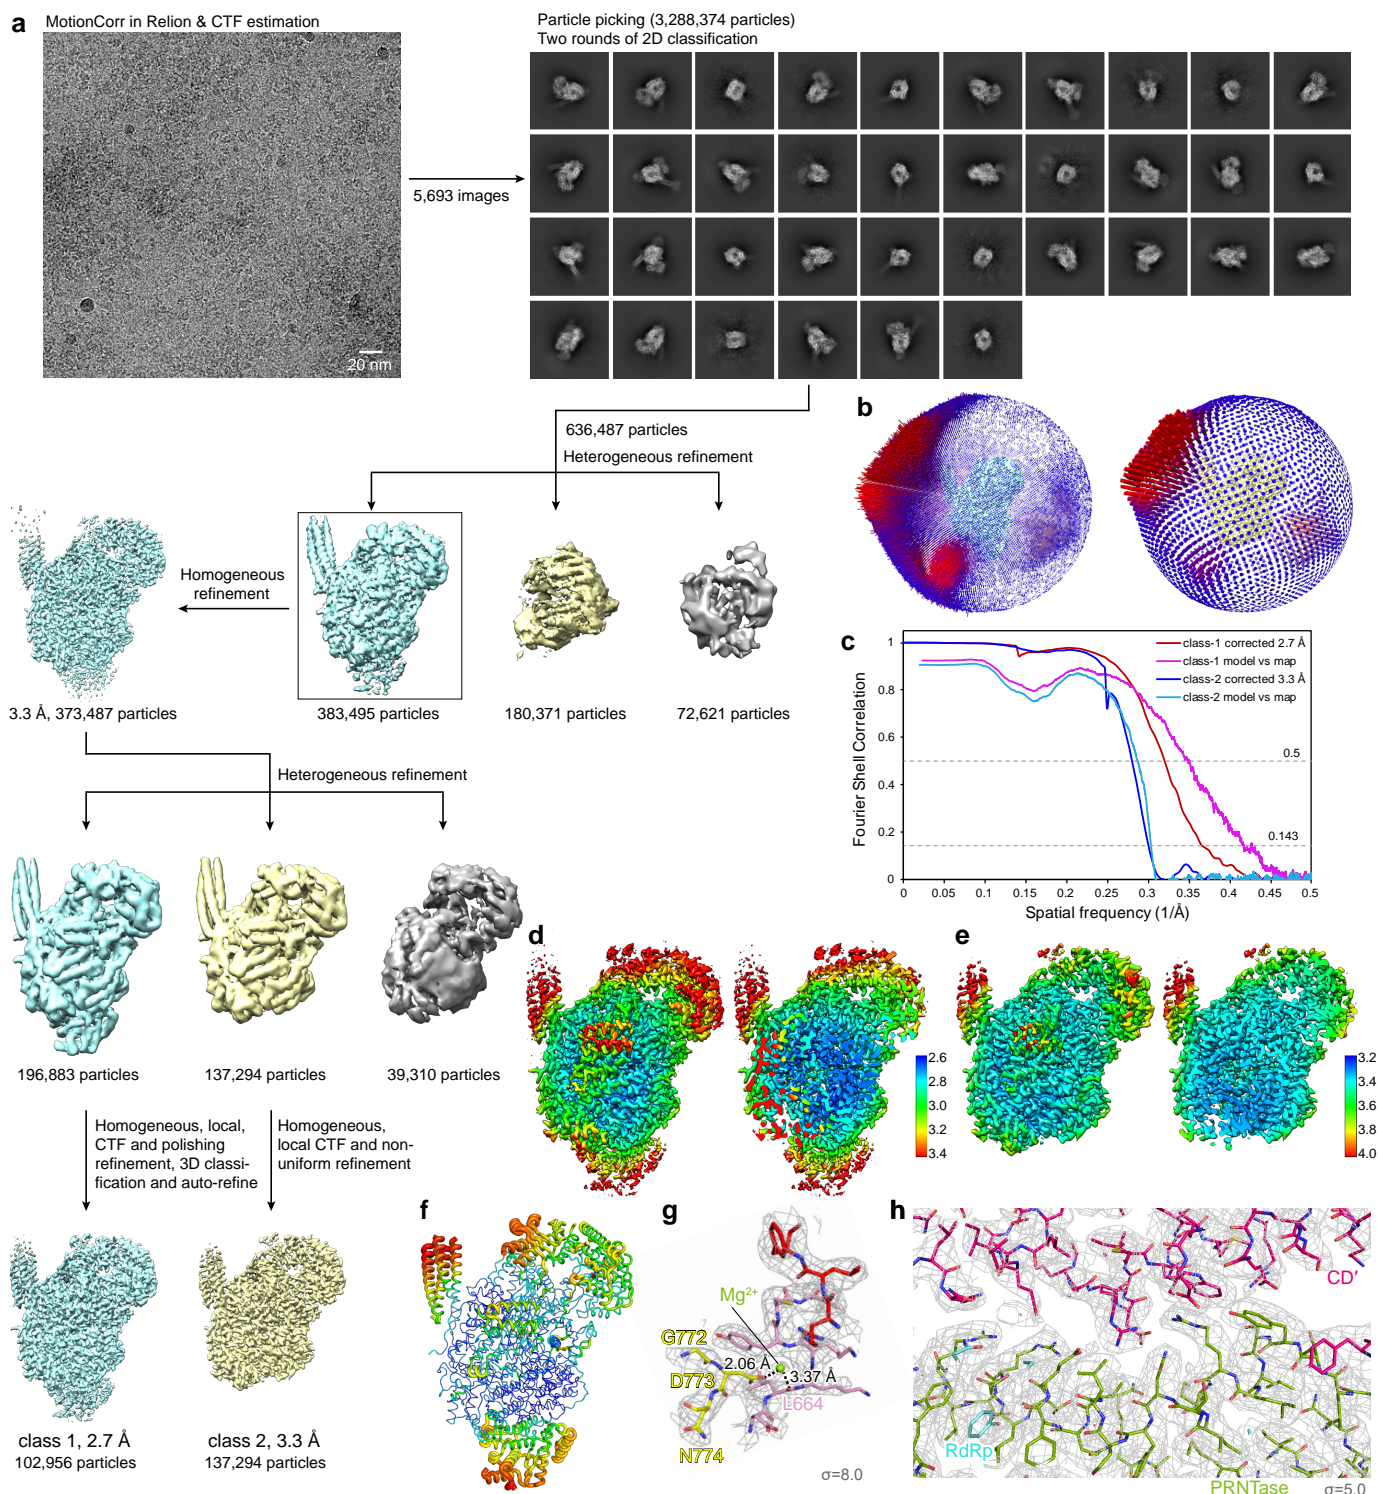

### Supplementary Fig. 1. Cryo-EM data processing.

**a** Flow chart of single particle cryo-EM data processing. **b** Angular distribution of the particles for class 1 (left panel) and class 2 (right panel). **c** The Fourier shell correlation (FSC) curves were used to calculate the resolutions of the final reconstructions with the cutoff of 0.143 and the resolutions are consistent with the model-to-map correlation (0.5 criterion). **d**, **e** Local resolution estimation of the reconstructed cryo-EM density maps of class 1 with CD' (**d**) and class 2 without CD' (**e**). Overview on the left and cut-out view on

the right. **f** B-factor analysis of the class 1 structure showing the rigidity and flexibility. The coloring-thickness scale varies from blue and thin (rigid residues) to red and thick (flexible residues). **g, h** Representative electron density maps around the RdRp active site including the presumed magnesium ion ( $\text{Mg}^{2+}$ ) and catalytic residues 772-GDN-774 (**g**), and at the L-L dimeric interface between CD' and RdRp-PRNTase of the intact L (**h**). The maps are shown as grey mesh, contoured at 8.0 and 5.0  $\sigma$ , respectively. The distances (angstrom, Å) between  $\text{Mg}^{2+}$  and the oxygen atoms of two coordinated residues are labeled.

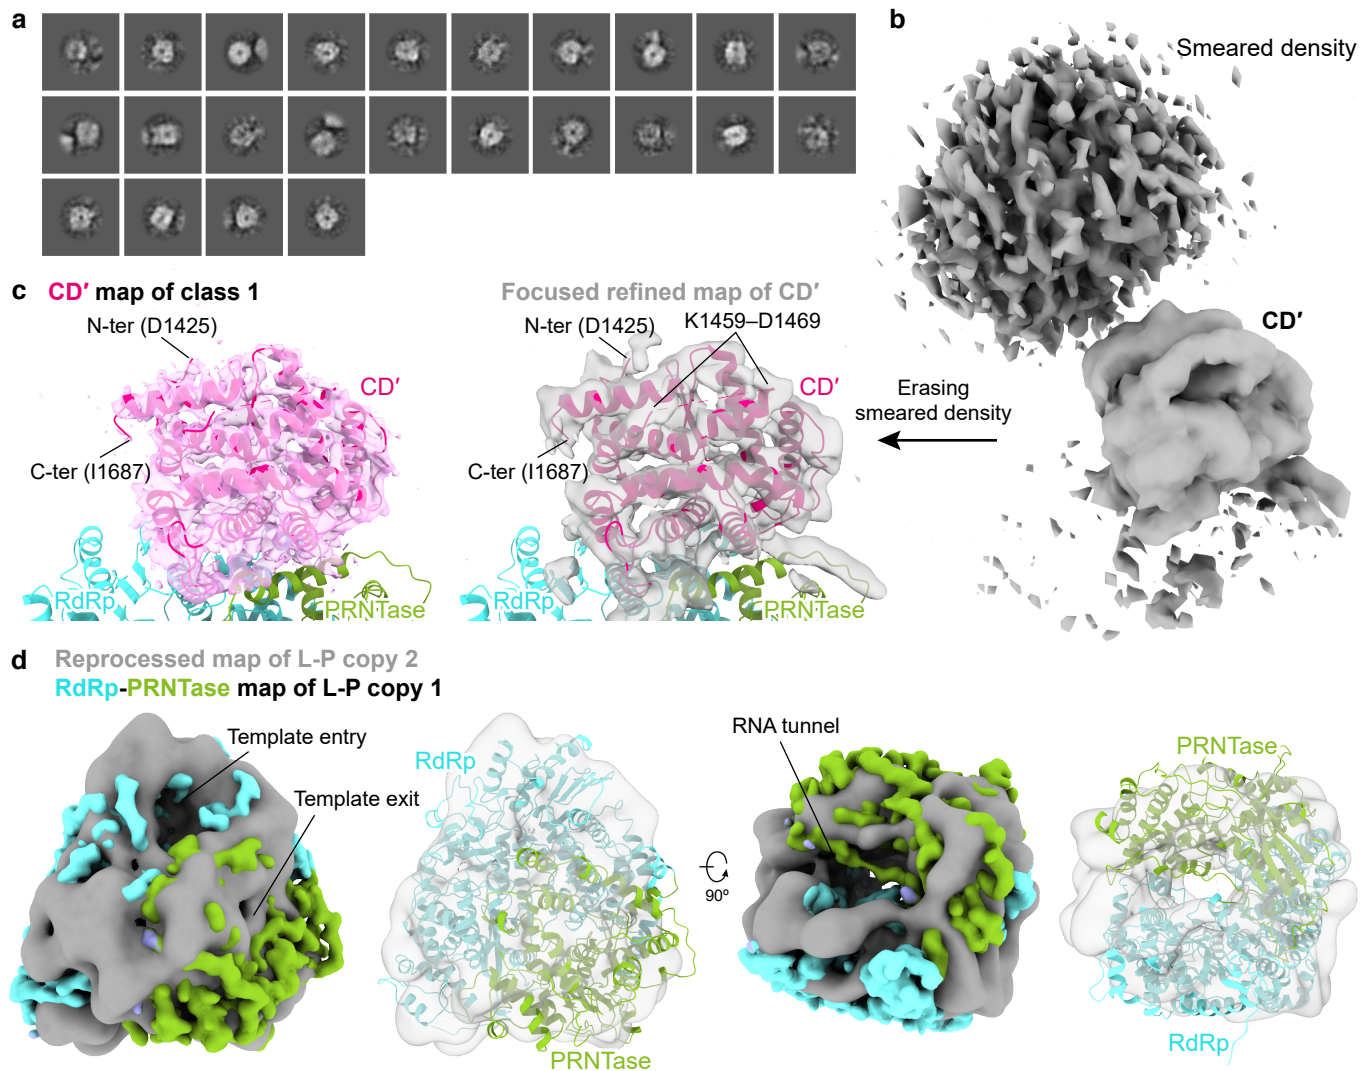

**Supplementary Fig. 2. Reconstruction of L-P copy 2 in class 1 particles by subtraction of the “complete” L-P copy.**

**a** 2D classification of L-P copy 2 after subtraction of the “complete” L-P copy 1 from class 1 particles. **b** 3D classification with good CD' alignments derived from the refinement of class 1. **c** Focused refinement after erasing the smeared density in **b** obtained a 4.5 Å map of CD'. The original CD' map of class 1 is shown in the left panel. The CD', RdRp, PRNTase domains are shown in ribbons. The N- and C-terminal residues of CD' and the visible loop between Lys1459 and Asp1469 of CD' in the focused refined map are labeled. **d** Reconstruction of the particles from the 2D classes in **a** with re-calculated alignments obtained a map of potential RdRp-PRNTase of L-P copy 2 at 7.0 Å. The RdRp-PRNTase map and structure of L-P copy 1 in class 1 are fitted into the reprocessed map. Rotated view by 90° about the horizontal axis is shown in the right panel. The proposed template entry, template exit and RNA tunnel are labeled.

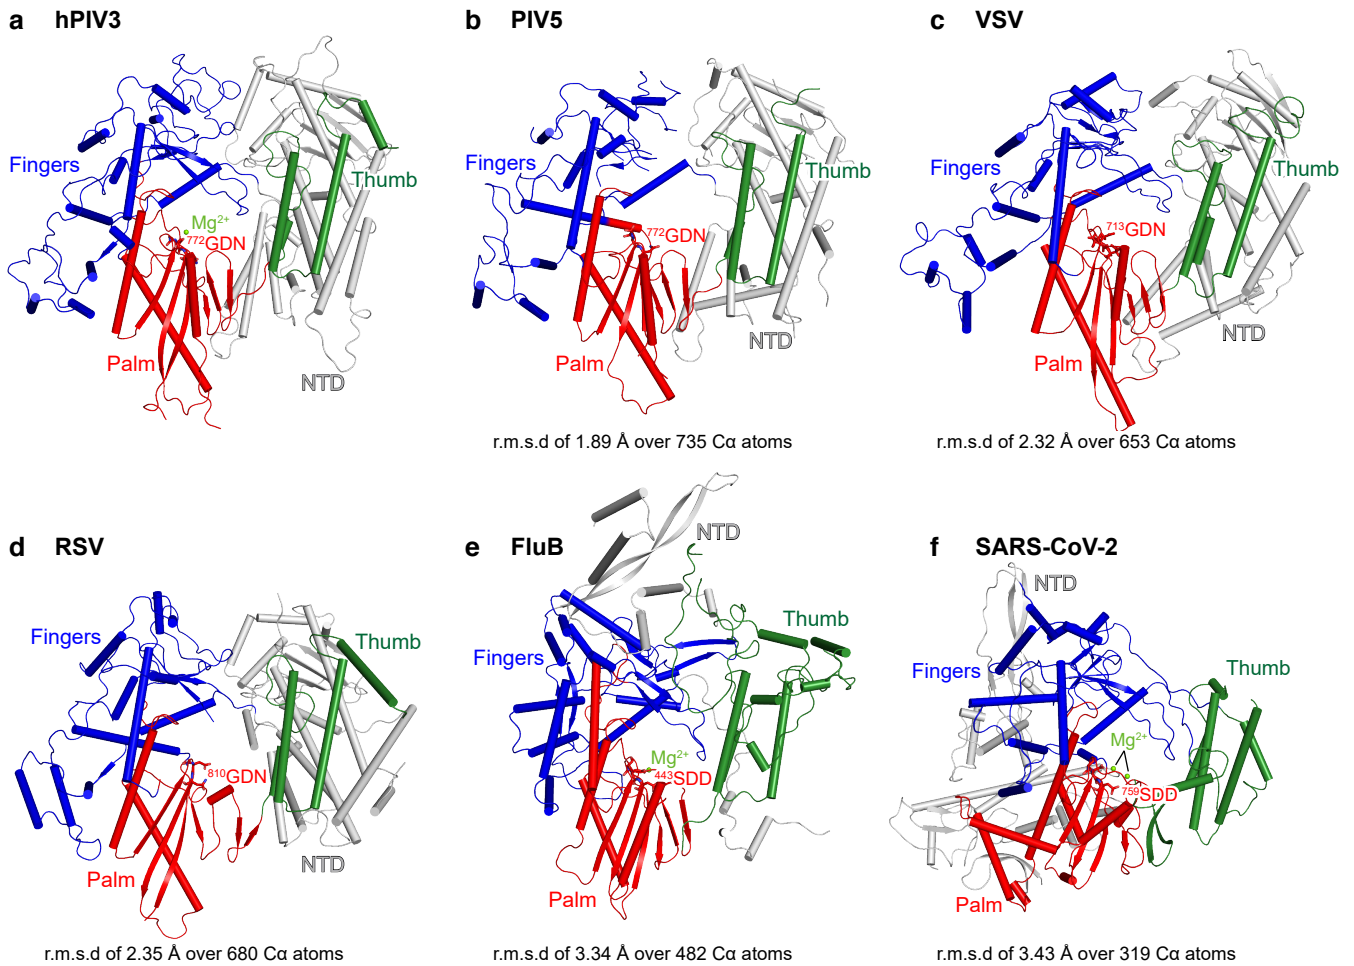

**Supplementary Fig. 3. Similarity of the RdRp domains between hPIV3 and other viral polymerases.**

The polymerase RdRp domains of hPIV3 (a); PIV5 (PDB 6V85) (b); VSV (PDB 6U1X) (c); RSV (PDB 6PZK) (d); FluB (PDB 6QCX) (e); SARS-CoV-2 (PDB 7BV2) (f). The RdRp subdomains are colored as depicted in Fig. 2a. The catalytic residues and magnesium ions at the active site are shown as sticks and sphere, respectively. Structures are superimposed to hPIV3 RdRp domain including the N-terminal region (NTD) with low structural similarity, and the root mean square deviation (r.m.s.d) value and residue coverage are marked.

hPIV3\_L

1 10 20 30 40 50

α1 α2

hPIV3\_L MDTESNNGTVSDILYPECHMNSPIV... KGKIAQLHTIMSLPQPYDMDSSILNITRQKIKL  
cPIV3\_L MEFEIQNRRTSDILYPECHMNSPIV... KGKIAQLHTIMSLPQPYDMDSSILNITRQKIKL  
hPIV1\_L MDKQESSQNSSDILYPECHMNSPIV... KSKIAQLHVLVDINQPYRLKDNISINITRQKIRN  
SeV\_L MDGQESSQNSSDILYPECHMNSPIV... RGKIAQLHVLVDINQPYRLKDNISINITRQKIRN  
MeV\_L MDLSLVNIDILYPECHMNSPIV... TNKIVALEYARVHAYSLDDPILCONIKHRLKN  
NiV\_L MADELSDIIDIYPECHMNSPIV... SGKLISAIEYAQLRHNQPSDDKRLSENIRLNHLG  
PIV5\_L MARSREILLPEVHNSPIV... KHKLIIYKLLGNLNEIDLDDLGLPHNQWVQIA  
NDV\_L MAGSGSAREHQIILPEVHNSPIV... KHKLIIYKLLGLPLDECDLHLLSRQWKIL  
RSV\_L MDPILNNSANVYLTDSYKGVISFSECNALGSYIFN... PYLKNDYTNLISRQNPPL  
hMPV\_L MDPLNESTVNVYLPDSYKGVISFSETNAIGSCLLK... PYLKNDYTNLAKVATENPV  
VSV\_L MEVHDFETDFDNFNEDDYATREFLNPDERMITYLNHADYNNNSPLI... SDDIDNLIKRFNSLP... IPBMW...  
RABV\_L MLDPGEVYDDPIDPIELEAEPRTPIVPIVNLIRNSDYNNNSPLI... EDPARLMLLEWLTGK... RPY... RM

hPIV3\_L

60 70 80 90 100 110 120 130

α3 α4 β1 α5 α6

hPIV3\_L NKLDKQRQSRIRLKLILTEKVNLDLG... KYTFIRYPEMSKEMFKLY... IPGINSKVTELLKADRTYSQMTDGLRD  
cPIV3\_L NKLDKQRQSRIRLRLPILEKVDLGD... KYTFIRYPEMSYDMFHLL... IPGITTRLDLGLGRAQKTYNGMTDGLRN  
hPIV1\_L GGLSPRQIKIRSLGKALQRTIKDL... RYTFEPYPIFSLELLRLD... IPEICDKIRSIFVAVSDRLTRELSSGFQD  
SeV\_L GGLSPRQIKIRSLGKALQRTIKDL... RYTFEPYPIFSLELLRLD... IPEICDKIRSIFVAVSDRLTRELSSGFQD  
MeV\_L GFSNQMIINNVEVGNVIRSKLRSYP... AHSHPYPCNQLDFNIE... DKESTRKIRELLKGNLSKYSVNDKVFQ  
NiV\_L KRKSLYILRQSQGGDYIRNNIKNLK... EFMHIAYPECNILFISIT... SQGMTSKLDNIMKSEKAYNIISKVIG  
PIV5\_L HEESENLAQRVNRNLIHIPDLRKGHWQEVNVLWPLRILPLDFK... INDQPLFLKNWDKLVKESCSVINGAGTSQ  
NDV\_L ESSTPDIERMIKLGSRVHQTLSSH... KLTGILHRCLEDLVGLD... IPDSTNKFRIEKKIQIHNTRYGEPFTR  
RSV\_L IEHMNKLKLNITQSLISKYHKG... EIKLEEPTYPQSLMITYKSMTSSEQIAT... TNLKLIIRRAIEISDVKV...  
hMPV\_L IEHVRKLNANVSK... MKISDY... KVVPEVNMQHEIM... KNVHSC... LTLKQFLTRKSNISTLKL...  
VSV\_L DSKNW... DGVLEM... LTS... QANP... ISTSQMHKMWGMSDN... HDASQGSPLHVEKSENI... FD  
RABV\_L TLTDNCSRFRVLRKDYFKKVDLG... SLKVGGMAAQSMISLWLYGAH... SESNRSRRCITDLAHFYSKS... SP

hPIV3\_L

140 150 160

α7 α8

hPIV3\_L LWINVLSKL... ASKNDGS... NYDLNEINNISKVH  
cPIV3\_L LWINVLSKL... ASTNDR... TYDINEDISNISNVH  
hPIV1\_L LWLNILRQL... GCVEGKE... GFDLKDVIDIPDIT  
SeV\_L LWLNIFKQL... GNIEGRE... GYDPLQDIGTPEIT  
MeV\_L CLRDTNSRLGIGSELREDIKE... KIN... LG  
NiV\_L MLQNIITRNL... ITQDRD... EINIHECRRLGLDGL  
PIV5\_L CIQNLISYGL... TGRGNLFT... RSRELSGDRRDLKTVV  
NDV\_L LCSYVEKKL... LGSWTH... KIRSEFDSLRTDP  
RSV\_L YAILNKL... GLKEKDKIKSNNGQDEDNSVITTIKDDILSAVKDNQSHLAKADKNHSTKQKDTIKTLL... KKLMSMQ  
hMPV\_L NMIKDWL... QLKSTSD... DTSIL... S... FIDVE  
VSV\_L VVEFTIRGW... GNKPI... EYIKERWTDTSF  
RABV\_L IERLLNLT... GNRGLRIP... PEGVLSCLERVDYDNAF

hPIV3\_L

170 180 190 200 210 220

α9 β2 β3 β4

hPIV3\_L TTYKSDKW... YNPFKTFWFTIKYDMRRLQKAR... NEITFNVG... KDYNLLEDQ... KNFLLIHPELVLLIDKQ... N  
cPIV3\_L TVYQSDRW... FGGFKTFWFTIKYDMRRLQKGG... NEILCSNQ... KDYNLLEDL... KNILVIHSEFVLVLDKQ... R  
hPIV1\_L DKYNKNTW... YRPFLLTFWSIKYDMRWQKKNK... SGNHLDVS... NSHNFLDCK... SYILIIYRDLVNIINL... K  
SeV\_L DKYSRNRW... YRPFLLTFWSIKYDMRWQKQTR... PGGPLDTS... NSHNLLECK... SYTLTYGDLVMIINL... T  
MeV\_L VYMSQSQW... FEPFLFWFTVKTEMRSVIKSR... THTCRRR... HTPVFTFGS... SVELLISRDVIAISKE... S  
NiV\_L KNMSQSKW... YECFLFWFTIKTEMRVAVIKNS... QKPKFRSD... SCIIHMRDK... STEIILNPNLICIFRSKDTG  
PIV5\_L AAWHSDSW... KRISDFWIMIKFQMRQLIVRQ... TDH... NDS... DLIITYENR... EGIITIPPELVALFNT... N  
NDV\_L AFWFHSSW... STAKFAWLHVQIQRHLIVAA... RTR... SAS... NKLVTLSHR... SGQVFTIPPELVIVITATN... E  
RSV\_L HP... PSWLHWFNLTYKLNILTYRSEVNEVK... HGFLLIDNQTLSGQFILLQYGCIVYHKE... L  
hMPV\_L FI... PSWVSNWFNSWYNLKLILFRREEVIR... TGSILCR... SLGKLVFVSSYGCIVYKSNK... S  
VSV\_L KILAYL... CQKFLDLHKLLTILNNAVSEVELLNLARTFKGVRRSSHGNTNICRIRVP... SLGPTFISEGWAYFKKLD...  
RABV\_L GRYLANT... YSYLFFHVITLYMNALDWDDEEKTILALWKL... TSVDIGKDLVRFKQ... IWGLLIVTRDFVYSQSSN...

hPIV3\_L

230 240 250 260 270 280 290

β5 α10 α11 α12

hPIV3\_L YNGYLITPELVIMYCDVVEGRWNISACAKLDP... KLQSMYQKGNLWVIDKLP... IMGKTFDVISLLEPLALS  
cPIV3\_L HRGYMLTPELVIMYCDVVEGRWNISACAKLDP... KLYSMHIKGNLWVMDGLFP... ILGKTFDVISLLEPLALS  
hPIV1\_L LTGYVLTPELVIMYCDVVEGRWNMSAAGRLDK... RSSKITCKGEEELWELIDSLFNLGEDVYNIISLLEPLSLA  
SeV\_L LTGYVLTPELVIMYCDVVEGRWNMSAAGRLDK... KSIYITCKGEEELWELIDSLFNLGEEYNYVAMLEPLSLA  
MeV\_L QHVYYLTFELVIMYCDVVEGRRLMTEAMTIDA... RYAEILGRVRYMVKLIDGFFP... ALGNPTQIVAMLEPLSLA  
NiV\_L KKCYYLTFELVIMYCDVVEGRMMETTVKSDI... KYQPLISRSNALWGLIDPLFP... VMGNRIYNIIVSMIEPLVLA  
PIV5\_L HTLTMTPELVIMYCDVVEGRHNLISLCTVST... YLNP... LK... RITY... LLS... LVD... N... LAF... IQ... G... V... Y... N... I... A... L... L... S... F... V... Y... A...  
NDV\_L NKFTCLSQELVIMYADMMEGRDMVNIISSTAV... HLRCLAEKIDDLRLVLDALARDLGNQVYDVVALMBSGFAYG  
RSV\_L KRITVTTYNQELITWKDISLSRLNVCLITWISNCLNTLNKSLGLRCGFNNVILTQLFLYGD... CLKLFHNEGFYI... KEVEGFIMS  
hMPV\_L KRVSFFTYNQELITWKDVMLSRFNANFCIWSNSLNEQEGGLRSLNQLQGMILTNYETVDYMLLCCNEGFSLKVEFGFIMS  
VSV\_L ILMDRNFFLMVKDVII... GRMOTVLSMVCRI... DNLFSEQDIFSLNLYRIGDKIVERQGNFSYDLIKMVPICNL  
RABV\_L CLFDRNYT... MLKDLFLSRFNLSMVLSSP... EPRYSDDLISQLCQLYIAGDQVLSMCGNSGYEVIKILPEYVVN

hPIV3\_L

300 310 320 330 340 350

η1 α13 α14 α15 α16

hPIV3\_L LIQTHDP... VKQLRGAFLNHVLSSEMELIFESG... ESIREFLSVDYI... DKILDFNESFIDEIA  
cPIV3\_L LIQTYDP... VKQLRGAFLNHVLAEMESVLSSTK... QNTDEANNIDYI... DRILDFVFKGTFIDEIA  
hPIV1\_L LIQLDDP... VTNLKGAFMRHVLTETLILIKD... NIYTDSEADSIM... ESLIKIFRGETSIDEKA  
SeV\_L LIQLNDP... VIPLRGAFMRHVLTETLQVLTSTR... DVYTDSEADTIV... ESLLAIFHGTSIDEKA  
MeV\_L YLQRLDI... TVELRGAFLNHCFTETIHDVLDQN... GFSDEGTYHELI... EALDYIFITDDIHLTG  
NiV\_L LLQKDE... ARILRGAFLNHCFTETIHDVLDQN... GFTDQKIRSMFI... DDLISILNIDNIHLTA  
PIV5\_L QLQMSDP... IPELRGAFHAFVCSSEILDALRG... NSFTQDELRTVT... TNLISFPQDLTFDLTA  
NDV\_L AVQLLEP... SGTFAGDFSFNLQELRDTLIC... LLPQRTADSVT... HANANFSGLEQNQAA  
RSV\_L ILLINITE... EDQFRKRFYNSMLNNTI... DAANKAKNLLSRVCHTLLDKTVSDNY... INGRWITLLSKFLK... LKLAGDNNLNLNS  
hMPV\_L EILIRITE... HAQFSTRNTLLNGLTD... QNTRKLNKNNLRVHSTVLEN... NDYPMYEVVLLKGLDTR... CKLICKLNNLNENAA  
VSV\_L KLMKLARESRPLVQFPHENHIKTSVDEGAK... IDRGIR... FLHDQIMSVMVVDLTL  
RABV\_L SLVQRAEKFRPLIHLSDGDFVFIKDKVQLE... TFGPCAR... RFFRALDQFDNIHDLV

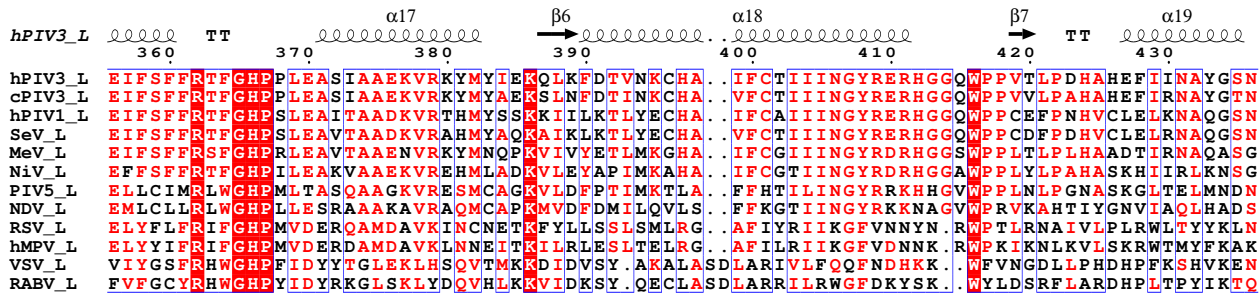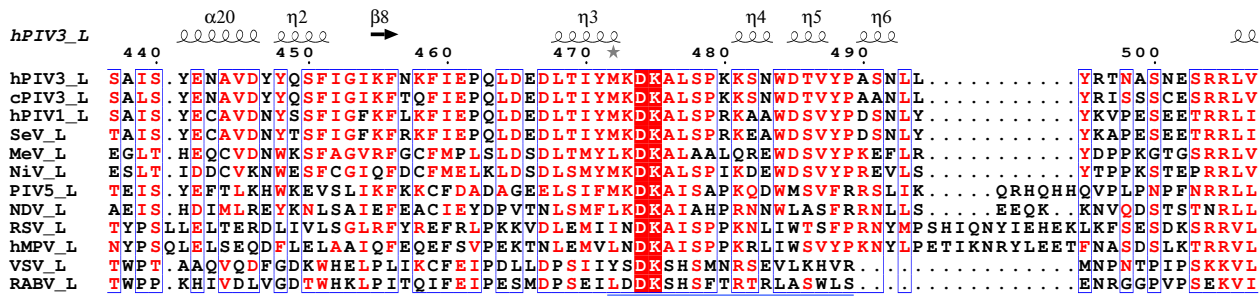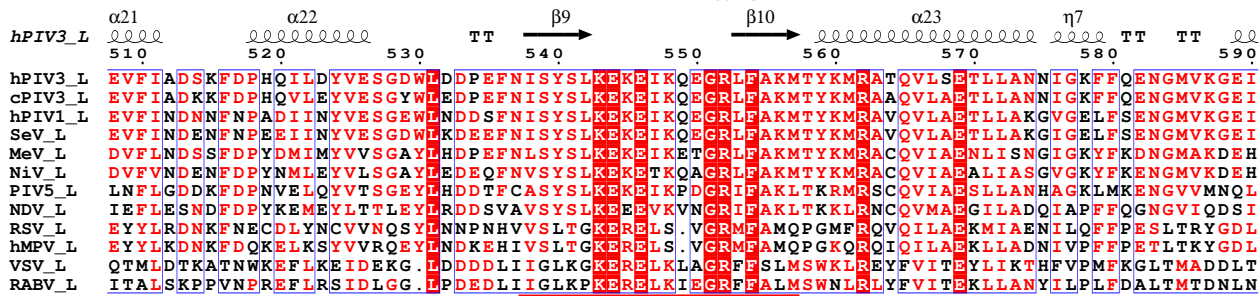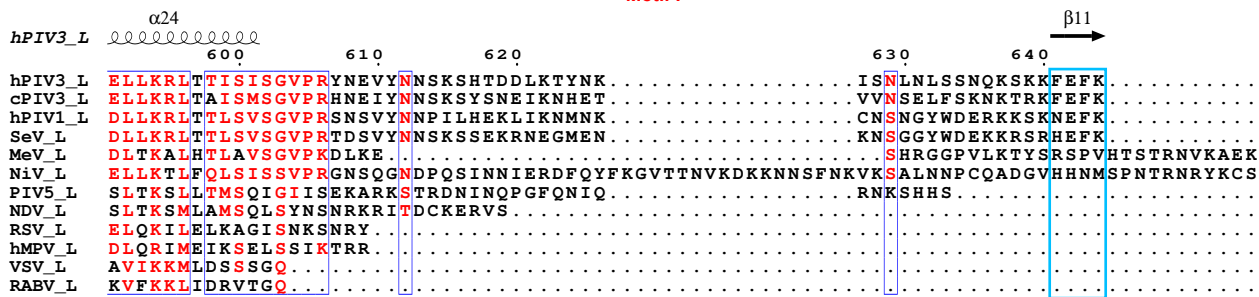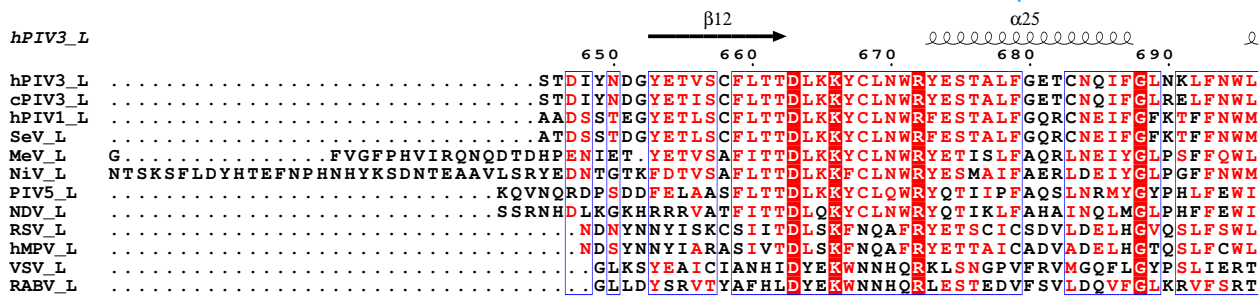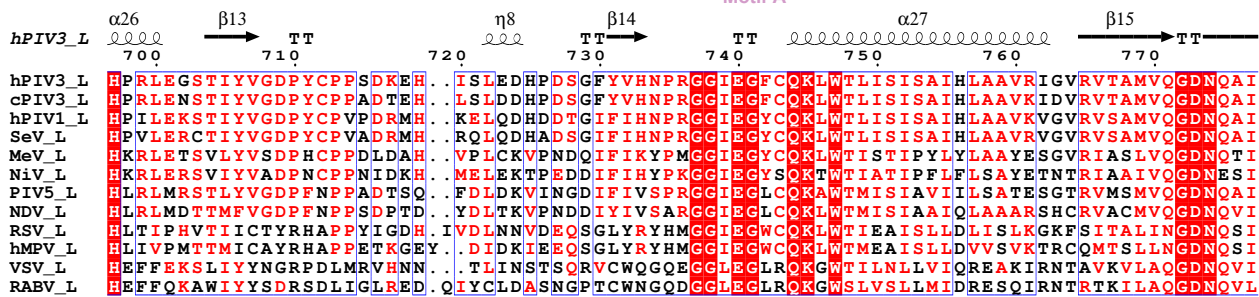

Motif G  
Motif F  
Motif A  
Motif B  
Motif C

hPIV3\_L  $\beta$ 16  $\alpha$ 28  $\beta$ 17  $\beta$ 18  $\beta$ 19  $\beta$ 20  $\alpha$ 29

780 TT 790 800 810 820 830 840 850

hPIV3\_L AVTRVPTNYD...YRIKKEIVYKDVVRFVDSLRVEMDDLGHELKLNETIISKMFVYSKRIYYDCRILPQALKALSRCVFWF

cPIV3\_L AVTRVPTNYD...YKTKKEIVYKDVVRFVDSLRVEMDDLGHELKLNETIISKMFVYSKRIYYDCRILPQALKALSRCVFWF

hPIV1\_L AVTSRVPVQT...YKQKKNHVEEITRYFGALRHVMFDTGHELKLNETIISKMFVYSKRIYYDGKILPQCLKALTRCVFWS

SeV\_L AVTSRVPVQT...YKQKKNHVEEITRYFGALRHVMFDTGHELKLNETIISKMFVYSKRIYYDGKILPQCLKALTRCVFWS

MeV\_L AVTKRVPSWP...YNLKKREARVTRDYFVILRQRLLHDGHHLLKANETIVSSHFFVYSKGIYYDGLLVQSKLKSIAKRCVFWF

NiV\_L AITQKVHPNLP...YKVKKEICAKAQLYFERLRMLRNLRAIGHLLKANETIVSSHFFVYSKGIYYDGLLVQSKLKSIAKRCVFWF

PIV5\_L AVTRVPRSLP...TLEKKTIAFRSCNLFERLKNFNGHLLKKEQETISSHFFVYSKRIYFQGRILTQALKNASKLCITA

NDV\_L AVTREVRPDS...PESVLTQLHEASDNFFRELIHVNHLGHNLDKRETRIRSDTFFIYSKRIFKDCAILSVQKLNKSKLVLS

RSV\_L DLSKPIRLMEG...QTHAQADYLLALNSLKLLEYKEYAGIGHKLGKGTIYISRDQMFSKTIQHNQYYPASIKKVLRVGPWI

hMPV\_L DVSQPKVLSL...LDEVKADYRLAVKMLKEIRDAYRNLGHHLLKKEQETIYISRDQFISKVQSEGVMPHTPIKKVLRVGPWI

VSV\_L CTQYKTKKSRNVVELQGGALNQMVSNNEKIMTAIKIGTGKGLLINDDETMSADYLVNKGKIPIFRQGVIRGLETKRWSRVTCVT

RABV\_L CPTMYLSPGLSQEGLLYELERISRNALSIRAVVEGASKGLLIKKEETMCSYDFLIYKTPLEFRGNILVEEKRWRARVSCVS

hPIV3\_L  $\alpha$ 30 Motif D  $\alpha$ 31 Motif E  $\alpha$ 32

860 870 880 890 900 910 920

hPIV3\_L ETVIDETRASSNLT...SFAKAIENGY...PVLGYACISFKNIQQLYIALGMN...INPTITQ...NIKDQYF...

cPIV3\_L ETIIDETRASSNLT...SFAKAIENGY...PVLGYVCSIFKNIQQLYIALGMN...INPTITQ...NIKDQYF...

hPIV1\_L ETIVDENRSACSNIAT...SIAKAIENGY...PILGYCIALFKTQOVCSISLGMT...INPTITQ...TIKDQYF...

SeV\_L ETIVDENRSACSNIAT...SIAKAIENGY...PILGYCIALFKTQOVCSISLGMT...INPTITQ...TIKDQYF...

MeV\_L ETIVDETRASSNLT...TMAKSIERGYD...RYLVS...LNVLKV...QOILISLGF...INSTMT...DVTSPIL...

NiV\_L ETIVDETRASSNLT...TIAKAIENGL...RNVGYC...LNLKVI...QQLLISTEFS...INETTL...DVTSPIS...

PIV5\_L DVLGECTQSSCNLT...TVMRLTENGE...KDCIFYLNIMYIKQLSYDIIIF...QVSPGD...QITLEYI...

NDV\_L GDLSENTVSSCANISS...TVARLCENGLP...KDFCYLNLYMSCIQTYFDSEFS...ITSSTQ...GSNSWI...

RSV\_L NTILDDFKVSLSEIS...LTQELEYRGS...LCSLIFRNVWLYNQIALQLK...ALCN...NKLYLDILKVLKHLKTFN...

hMPV\_L NTILDDFKVSLSEIS...LCQELEFRGS...IIVSLIRNFVWLYNLYMHESK...PLAG...KQLFKQLNKLTSVQRFFEI

VSV\_L NDQIPTCANIMSSVTNALTVAHFAENPIN...AIMQY...NYFGTARLLMMHDPALRQSLYEV...QDKIPGL...

RABV\_L NDQIVNLANIMSTVST...NALTVAQHSQSLIKP...MRDF...LLMSVQAVFHLYL...LFSPI...LKG...VYK...ILS...AEGE...

hPIV3\_L  $\alpha$ 33  $\eta$ 9  $\alpha$ 34  $\alpha$ 35

930 940 950 960 970 980

hPIV3\_L KNSNWMQYASLIPASVGGFNMYAMSRCFVRNIGDPSVALADIKRFIKANLL...DRSVLYRIMNQEPG...

cPIV3\_L RNPNWLYKASLIPASVGGFNMYAMSRCFVRNIGDPAVALADIKRFITVNL...DRGVLYRIMNQEPG...

hPIV1\_L KGKNWLRCAALIPAPICGFNYMSTARCFVRNIGDPAVALADIKRFIKAGLL...DKQVLYRVMNQEPG...

SeV\_L KGKNWLRCAALIPANVGGFNMYMSTARCFVRNIGDPAVALADIKRFIRADLL...DKQVLYRVMNQEPG...

MeV\_L TNNDDLIRMAALLPAPICGMNYLNMSTRCFVRNIGDPTVTSADLKRMLASL...PEETLHQVMTQPPG...

NiV\_L NNLDWLITAAALIPAPICGFNYLNLSTRCFVRNIGDPTVTSADLKRMLDHSIM...TESVLQVMNQEPG...

PIV5\_L NNPHLVSRIALALLPQGLGNYLSCSRLLFNINIGDPTVTSADLKRMLKSGCM...DGYWMLYNLHGRKPG...

NDV\_L NDIPFIHSYVLTTPAQGLGSLNLYSRLLYTRNIGDPTVTSADLKRMLAVGLL...DPNMTINILTRPPG...

RSV\_L DNLDTALTLVYMLPMLFGGDPNLYRISFYRRTPDFLTEAIVHSVFILSYTNDHLKDKLQDSDDRLLKFTCIIITFDKN...

hMPV\_L KRENEVDLWMLNIPMQFGGDPVVFYRISFYRRTPDFLTEAIVHSVILKISAN...IKNETKVSFFKALIEKN...

VSV\_L HSSFFKYKLVNLDPSIGGVSGMSLSRFLIRAFPDPVTEISFWRFVHVA...RSEHLKMSAVFGNPEIAKF...

RABV\_L SFLLAMSRITVLDPSIGGVSGMSLSRFLIRAFPDPVTEISFWREIWLSS...QESWIHALCQEAAGNPDLGER

hPIV3\_L  $\alpha$ 36  $\alpha$ 37  $\alpha$ 38  $\alpha$ 39  $\beta$ 21  $\alpha$ 40

990 1000 1010 1020 1030 1040 1050 1060

hPIV3\_L ESSFLDWSAPFYSCNLPQSQNITTMKKNITARNVLDSP...NPLLSGLFTNTMIEEDEELAEFLMDRKLIPRVAHDIIDN

cPIV3\_L ESSFLDWSAPFYSCNLPQSQNITTMKKNITARNVLDSP...NPLLSGLFTPTMIEEDEELAEFLMDRKLIPRVAHDIIDN

hPIV1\_L DSSFLDWSAPFYSCNLPQSQSITTIKKNVTARNVLDSP...NPLLSGLFSESSSEEDLNLAFLMDRKLIPRVAHDIIDN

SeV\_L DSSFLDWSAPFYSCNLPQSQSITTIKKNITARNVLDSP...NPLLSGLFTESSSEEDLNLAFLMDRKLIPRVAHDIIDN

MeV\_L DSSFLDWSAPFYANLVCVQISITRLKKNITARNVLIHSP...NPMLKGLFHDHDSKEEDERLAEFLMDRKLIPRVAHEILDH

NiV\_L DASFLDWSAPFYGNLDPQSQSITTKIKKNITARTILRNSP...NPMLKGLFHDHDSKEEDERLAEFLMDRKLIPRVAHEILDN

PIV5\_L NGSWATLADAPFYINIEYQYPTTALKRHTQALMELTS...NPMLRGIFSDNAQAEENNLAEFLLDREVIIPRVAHIIEQ

NDV\_L NGSWASLNDPQYFESVAPSPVLLKHTQVFLFETCS...NPLLSGVHTEDEAEKALAEFLLDREVIIPRVAHIMEA

RSV\_L PNAEFTVLLRDPQALGSEROAKVITSEINRLAVFEVLSSTAP...NKIFSKSAQ...HYTTTEIDLDNIMQNIPEYVPHGLRVVYES

hMPV\_L ERATLTLMLRDPQALGSEROAKVITSEINRLAVFEVLSSTAP...NKIFSKSAQ...HYTTTEIDLDNIMQNIPEYVPHGLRVVYES

VSV\_L RITHIDKLVDEPTSLNIAMGMSANLLKTEVKKCLIESRQTRNQVIRKDATI...YLYHEEDRLRSFLWSINPLFRFLSEFKSG

RABV\_L TLESFTRLEDEPTTLNIRGASPTLLKDAIRKALYDEVDKVE...NSEFREAIL...L...SK...THR...DN...FL...ISVE...L...FR...L...SE...L...F...S...

hPIV3\_L  $\alpha$ 41  $\alpha$ 42  $\alpha$ 43  $\alpha$ 44  $\eta$ 10  $\alpha$ 45

1070 1080 1090 1100 1110 1120 1130 1140

hPIV3\_L SLTGIRNAIAGMLDTTSLIRVGINRGGLTYSLLRKNISNYDLQYETLSRTL...RLIVSDKI...RYEDMCSVDLAIARLQKM

cPIV3\_L SLTGIRNAIAGMLDTTSLIRVGINRGGLTYSLLRKNISNYDLQYETLSRTL...RLIVSDKI...RYEDMCSVDLAIARLQKM

hPIV1\_L SLTGVRNAIAGMLDTTSLVRSVRRGGLSLSLRLRLINYLQYETLTRL...RKPVKDNI...EYEMCSVDELAIARLQKM

SeV\_L SLTGVRNAIAGMLDTTSLVRSVRRGGLSLSLRLRLINYLQYETLTRL...RKPVKDNI...EYEMCSVDELAIARLQKM

MeV\_L SVTGAREIAGMLDTTGLIRASMRKGGLTSRVTLRSLNYDYQFRAGMVL...TGRKRNVL...IDKESCSVQLARALRSHM

NiV\_L SLTGAREIAGLLDTTGLIRSGLRKSGLOPKLVRLSHHDYNQFLILNKL...SNRRQNDL...ISSNTCSVDLARALRSHM

PIV5\_L TSVGRKQIQGLDSTRSIRKSLKPLSNRKLNEILDYINILAYNLALL...KNAIEPPTYLKAMTLECSIDIARLRLKLS

NDV\_L TSVGRKQIQGLVDTTNTVIKIALSRKPLGIKRLARIINYSMMHMLFRDDV...FLSNRANHP...VSSDMCSLALADYARNRS

RSV\_L LPFYKAEKIVNLSIGTKSITNILEKTSAINLDTIDRATENMRKNITLLRIL...PLDCNRDKREILSMENLISITELSKYVRETS

hMPV\_L LPFHKAEKVVNLSIGTKSITNLLQRTSAINGEDIDRAVSMMLNGLLSRIL...SVVDSIEIPIKSNGR...LCCQISRLTRET

VSV\_L TFLGVADGLISLFQNSRTIRN...SFK...KKYHRELDLIVRSEVSSLTHLGLKHLRRGS...CKMWTCSATHADTLRYKS

RABV\_L SFLGIPESIIIGLIQNSRTIRR...QFR...KSLK...LE...ESFYNSEIHG...ISRM...TQTP...RVG...GVWP...CSSERA...DL...REIS

hPIV3\_L  $\alpha$ 46  $\beta$ 22  $\alpha$ 47  $\beta$ 23  $\alpha$ 48  $\beta$ 24 TT

1150 1160 1170 1180 1190 1200 1210 1220

hPIV3\_L WIHLISGGRMTSGLLETPDPELELL...SGVVITGSEHCKICYSDGNTNP...YTWMYLPGNIKIGSAETGVSSLRVPYFGSVTDERSEA

cPIV3\_L WIHLISGGRMTSGLLETPDPELELL...SGVITGSEHCKICYSTGNP...YTWMYLPNNLIGSAESGIPSLRVPYFGSVTDERSEA

hPIV1\_L WFHLITGRPIHGLETPDPELELL...RGSFIEGSECKFC...RSEGNPMYTWFYLPDNIIDLTLNNGSPAIRPIYFGSAVDERSEA

SeV\_L WIHLITGRPIHGLETPDPELELL...RGIIEGSECKFC...RSEGGADPIYTWFYLPDNIIDLTLNNGSPAIRPIYFGSAVDERSEA

MeV\_L WARLARGRP...YGLEVPDVEISM...RGLHRRHETCVIC...GSVN...YGWFFVPSGCLDDIDKETSLLRVPYIGSTDERSDM

NiV\_L WRLLALGRVY...YGLEVPDALEAM...VGRYITGSGCEQ...GNTM...YGWFFVPRDSDLDQVDRHSSLRVPYVGSVDERSDI

PIV5\_L WAPLLGRNLEGLVTPDPEIT...AGALITGSGCEQ...GNTM...YGWFFVPRDSDLDQVDRHSSLRVPYVGSVDERSDI

NDV\_L WSPLLTGGRKILGVSNDPIELV...EGELISIGGCKC...GDEQ...FTWFHLPNSIELTDDTSKNPPMRVPLGSKQERRAA

RSV\_L WS...LSNVGVTSPTMYTM...DKIYA...TSTT...SS...GIIIEKYNVNSL...GERGP...TKPWVGS...QEKKTM

hMPV\_L WN...NMEVGVTSPTMYTM...DKIYA...TSTT...SS...GIIIEKYNVNSL...GERGP...TKPWVGS...QEKKTM

VSV\_L W...GRTVIGTTVP...HPLEMLGPQHRK...ETPCAPCNT...SGFN...YVSVHCPDGIHD...VFSR...GPL...PAYLGS...KTSSTSI

RABV\_L W...GRKVVGTTP...HPSEMLGLLPKS...SISCTCGATG...GNP...RVSVSVLP...SFDQ...SFSR...GPL...KGLG...S...S...T...Q...L





hPIV3\_L  $\beta$ 28  $\alpha$ 64  $\alpha$ 65

1660 1670 1680 1690 1700 1710 1720

hPIV3\_L ISGTLIKSFPSTVTVYVRKTAIKYLRIRGISP...PE...VIDDWDPIDENMLDNIKVT...INDNCN...KDNKGNK...  
 cPIV3\_L VSGLLIKSFPSTVTVYVRKTAIKHLRIRGISP...PS...IIEDWDPVEDENILDNIKAV...ISDNCN...CDNWSKNK...  
 hPIV1\_L LTGLVIKIFPSTLTLYIRKSSIKVLRVIRGIGI...PE...VLEDWDPDADSMLLDNITAE...VQHNIP...LKKNE...  
 SeV\_L LTGLVIKIFPSTLTLYIRKSSIKVLRTRGIGV...PE...VLEDWDPADNALLDGIAAE...IQQNIP...LGHOT...  
 MeV\_L INPIIVDHYCSLTYLRRGSIKQIR...L...RV...D...PGFIFDALAEVNV...SQPKV...  
 NiV\_L TSDLDVFIYFASLTLYLRGIIKQLRIRQVTE...VI...D...TTMLRDNI...VENP...PIKTVG...  
 PIV5\_L VENPRLAFAFANNYYLTKRLLNSIRDTESEGO...VA...VTSYYESLEYIDS...KLTTPHV...PGTSCI...ED...  
 NDV\_L ITSPSIVTFPANLYLRSKLNLRIRERDRDSI...LALMFPQ...EPLFEFFLVDIGARVK...  
 RSV\_L TSNLFYINY...NFSNDTHLLTKHRIANSELENNYKLYHPTPETLENILANP...IKSNDKKTINDYCI...GKNVDSIMLPLLSNKK...  
 hMPV\_L...RIDITVL...NYTDMAHALTRLIRKRLMCDNA...LLPTISSP...MVNLTQVIDPT...  
 VSV\_L...KDIILCP...E...EIRHAC...K...FG...IA...KDNKDMSYPP...  
 RABV\_L...RRTR...WVDQ...EVRHAA...RTMTG...DYS...P...N...KKVSRKVG...

hPIV3\_L TT  $\beta$ 29 TT  $\eta$ 13

1730 1740 1750 1760 1770

hPIV3\_L...INNFWGLALKNYQVLKI...RSITSD...SDDNDRLDA...STSGLTLPQGGNYLSHQLR...LFGI...  
 cPIV3\_L...CNYFWGLSLKKNYQVIRK...RSITIN...SEFPETSITQ...TNHGLLTPEGGNYLSHQLR...LFGV...  
 hPIV1\_L...RTPFWGLRVSKSQVLR...RGYE...EIKREERGRSGVGLTLPFDGRYLSHQLR...LFGI...  
 SeV\_L...RAPFWGLRVSKSQVLR...RGYK...EITRGEIGRSGVGLTLPFDGRYLSHQLR...LFGI...  
 MeV\_L...NNISNMSIKDFRPPHDDVAKLL...KDINTSKHNLP...SGGSLANVEIHAR...RIGL...  
 NiV\_L...LDIRGCIYINL...EEIL...SMNTKSASKKI...FNLNSRPSVENHKKY...RIGL...  
 PIV5\_L...DSLCTNDYIWIWI...ESNANLEK...YP...IPNSPED...D...SN...FHNFKLNAF...SHHT...PLGL...  
 NDV\_L...DQLTMKPAFLHLD...LSAPAR...YDAY...TLEQARS...DCA...LADMGEDQLVRYLFR...GVT...  
 RSV\_L...LIKSSAMIRTNYSKQDLYN...LFPMVVIDRI...IDHSGNTAKSNQLYTT...TSHQISLVHNS...TSLY...CMLPWHHIN...FNFV...  
 hMPV\_L...TQLDYFPKIFERL...KNYD...TSSNAYAKGKLT...RNYM...LILPQHW...RYNFV...  
 VSV\_L...WGRESRGT...ITTPV...YTTTPY...PKM...LEMP...PRI...NPLLSGTR...LGQL...  
 RABV\_L...CSEWVCSA...QOV...AV...STSAN...PAPVS...ELDIRALS...RFP...NPLISGTR...VVQW...

hPIV3\_L  $\alpha$ 66  $\beta$ 30  $\alpha$ 67  $\beta$ 31  $\eta$ 14 TT  $\alpha$ 68

1780 1790 1800 1810 1820 1830 1840 1850

hPIV3\_L...NSTSCLKALELSQILMKEVNDK...KDRFLFLGEGAGAMLA...CYDAT...LGPAIN...YNSGLNI...TDVIG...QRELKI...FPSEVSLV...GK...  
 cPIV3\_L...NSTSCLKALELSQILMREVSKD...KDRFLFLGEGAGAMLA...CYDAT...LGPAMN...YNSGLNI...TDVIG...QRELKI...FPSEVSLV...GK...  
 hPIV1\_L...NSTSCLKALELTYLLNPLVNDK...KDRFLFLGEGAGAMLA...CYDAT...LGPAMN...YNSGLNI...TDVIG...QRELKI...FPSEVSLV...GK...  
 SeV\_L...NSTSCLKALELTYLLNPLVNDK...KDRFLFLGEGAGAMLA...CYDAT...LGPAIN...YNSGLNI...TDVIG...QRELKI...FPSEVSLV...GK...  
 MeV\_L...NSSACYKAVELSTLIRRCLEPG...EDGLFLGEGAGAMLA...CYDAT...LGPAIN...YNSGLNI...TDVIG...QRELKI...FPSEVSLV...GK...  
 NiV\_L...NSSACYKAVELSTLIRRCLEPG...EDGLFLGEGAGAMLA...CYDAT...LGPAIN...YNSGLNI...TDVIG...QRELKI...FPSEVSLV...GK...  
 PIV5\_L...SSTAWYKGISCCRYLRLKLPQ...GDHLYIAEGSGASMTIEYL...FPGK...IYNSL...FSSGD...NPP...QRNYF...P...TQFIESV...PK...  
 NDV\_L...ASSWYKASHLLSVPEIRCARH...GNSLYLAECSGAIMSLELH...IPHETI...YNTLFSNEMNP...PQRHAG...P...TQFIESV...PK...  
 RSV\_L...SSTGCK...ISIEY...ILKDLKIKDP...NCIAFIFEGAGNLLRTVVEL...HPDIRY...YRSLKDC...NDHS...LPIEF...LR...YN...  
 hMPV\_L...SSTGCK...VSLKTCIGKMLKDLNLP...KVLVYFIFEGAGNWMARFACE...YDIDK...FVYRSLKDD...LDH...H...YPLEY...QRV...IG...  
 VSV\_L...PTGAHYK...IRSLHGMGIHY...RDLFSCGDSGGMTAALLRE...NVHSG...IFNSLLEL...SGSVM...RGA...SEPP...PSALE...TL...GG...  
 RABV\_L...ATGAHYK...LKPILDDLNVP...SLCLVVGDSGGSISR...AVLNM...FPDAK...LVFNSLLE...VNDLMA...SGTHPLP...PSAIM...RG...GN...

hPIV3\_L  $\eta$ 15  $\beta$ 32  $\eta$ 16  $\alpha$ 69  $\beta$ 33  $\alpha$ 70

1860 1870 1880 1890 1900 1910 1920 1930

hPIV3\_L...K...LGNVTQILNRVKVLF...NGNPNSTWIGNMECESLWSELN...DKSIGLVHCDMEGAIGKSEETVLEHHY...SVIRITY...LI...  
 cPIV3\_L...K...LGNVTQILNRVKVLF...NGNPNSTWIGNMECESLWSELN...DKSIGLVHCDMEGAIGKSEETVLEHHY...SVIRITY...LV...  
 hPIV1\_L...K...LNNVTSICQVVKVLF...NGNPGSTWIGNMECESLWSELN...NNSIGFVHCDMEGGEHKCDQV...VLEHHY...SVIRIAY...LV...  
 SeV\_L...K...LNNVTSICQVVKVLF...NGNPGSTWIGNMECESLWSELN...NNSIGFVHCDMEGGEHKCDQV...VLEHHY...SVIRIAY...LV...  
 MeV\_L...R...MGVNIKVKVLF...NGRPEVTVGSDICEFNFI...VNSLP...TSSVGFHSDIEITLPNK...DIEKLEELAA...LSMALL...LV...  
 NiV\_L...D...PSLTGKLGKLVVLF...NGRPEVTVGSDICEFNFI...VNSLP...TSSVGFHSDIEITLPNK...DIEKLEELAA...LSMALL...LV...  
 PIV5\_L...LWQAHTDQYPIEFDFPLW...NGNAAMTDIGMTACVEF...INRVG...PRTC...SLVH...DLESSAS...NQQLS...PK...INAI...TATTV...  
 NDV\_L...NLQAQVPCDGFVQEFRLW...RENTFESD...LTSKAVG...YVLSNGY...ACRGM...E...YV...FVMGYL...GGPT...FV...N...AKT...LI...QRHG...  
 RSV\_L...G...HINIDYGE...NLTPATDATN...NIHWSY...LHKF...AEP...ISL...FV...DAELSV...RDNWS...K...II...EWS...K...V...R...C...K...  
 hMPV\_L...E...LSRIIDSGE...LSMETT...D...T...D...H...L...H...R...V...S...D...K...D...L...L...I...T...C...D...A...E...F...K...D...  
 VSV\_L...D...KSRCVNGE...TCWEY...P...SD...L...C...D...P...R...T...W...Y...F...L...R...L...K...A...G...L...G...I...D...L...I...V...M...D...M...E...V...R...  
 RABV\_L...D...IVSRVIDLD...SIWEK...P...SD...L...R...N...I...A...T...W...K...Y...F...Q...S...V...Q...K...Q...V...M...S...Y...D...L...I...C...D...A...E...V...T...  
 ...D...IAS...IN...R...IT...LL...M...S...D...F...A...L...S...

hPIV3\_L  $\beta$ 34  $\alpha$ 71  $\beta$ 35 TT  $\beta$ 36  $\alpha$ 72

1940 1950 1960 1970 1980 1990 2000

hPIV3\_L...GDD...DVLVLSKIIP...ITPNWSRILYLYKLYW...D...VSIISLKT...SNPASTE...LYL...ISKDAYCT...IMEPSEV...VL...SKLKR...LS...  
 cPIV3\_L...GDD...DVLVLSKIIP...LTPNWSKIITLYLYKLYW...D...VRIISLKT...SNPASTE...LYL...SKEAYCT...VMEPSSV...L...SKLNR...LS...  
 hPIV1\_L...GDK...DVLVLSKIAPR...LGTDWTKQISLYLYRW...D...VSLIVLKT...SNPASTE...LYL...SKDPKSD...I...IEDS...N...VL...AN...L...PL...LS...  
 SeV\_L...GDR...DVLVLSKIAPR...LGTDWTKQISLYLYRW...D...VNLIVLKT...SNPASTE...LYL...SRHPKSD...I...IEDS...N...VL...AS...L...L...PL...LS...  
 MeV\_L...GKI...GSLVILKLMF...SGDFVQGFISYVGS...H...YRE...V...LV...Y...P...RY...SNFISTES...Y...LV...M...TD...L...KAN...R...L...M...N...P...K...I...K...Q...I...E...S...  
 NiV\_L...MME...DGLLVSKIAYT...PGFPI...S...R...L...F...N...M...Y...R...S...Y...F...G...L...V...L...V...C...F...P...V...Y...SNP...D...S...T...E...V...L...L...C...L...Q...K...T...V...R...T...I...V...P...P...Q...K...V...L...E...H...S...N...L...H...D...  
 PIV5\_L...LCP...HGVLILKYSWL...PFTR...F...S...T...L...I...T...F...W...C...Y...F...E...R...I...T...V...L...R...S...T...Y...S...D...P...A...N...H...E...V...L...I...C...I...L...A...N...N...F...A...F...Q...T...V...S...A...T...G...M...A...M...L...T...D...Q...G...F...  
 NDV\_L...VRE...GGVIVKILYS...MGYY...F...H...L...L...N...L...F...P...C...S...V...K...G...Y...V...L...S...N...G...Y...A...C...R...G...M...E...C...Y...V...V...F...V...M...G...Y...L...G...G...P...T...F...V...N...V...V...R...M...A...K...T...I...Q...R...H...G...  
 RSV\_L...YCS...S...V...N...K...M...L...I...K...Y...H...A...Q...D...I...D...F...K...L...D...N...I...T...L...K...T...Y...V...C...L...G...S...K...L...G...S...E...V...L...V...L...T...I...G...P...A...N...I...F...P...  
 hMPV\_L...ICT...TY...G...T...D...L...Y...L...F...A...K...Y...H...A...Q...D...I...D...F...K...L...D...N...I...T...L...K...T...Y...V...C...L...G...S...K...L...G...S...E...V...L...V...L...T...I...G...P...A...N...I...F...P...  
 VSV\_L...L...D...E...Q...G...V...L...I...Y...K...T...Y...G...T...Y...I...C...E...S...E...K...N...A...V...T...I...L...G...P...M...F...K...T...V...D...L...V...Q...T...E...F...S...S...Q...T...S...E...V...V...M...V...C...K...G...L...K...K...L...I...D...E...P...N...P...D...  
 RABV\_L...L...D...G...P...L...Y...L...V...F...K...T...Y...G...T...M...L...V...N...P...N...Y...K...A...I...Q...H...L...S...R...A...F...P...S...V...T...G...E...I...T...Q...V...T...S...S...F...S...S...E...L...L...R...F...S...K...R...K...G...F...F...R...D...A...E...Y...L...T...

hPIV3\_L  $\alpha$ 73  $\alpha$ 74  $\alpha$ 75

2010 2020 2030 2040 2050 2060

hPIV3\_L...LLEENN...L...L...K...W...I...L...S...K...K...R...N...N...E...W...L...H...E...I...K...E...G...E...R...D...Y...G...V...M...R...P...Y...H...M...A...L...Q...I...F...G...F...Q...I...N...L...N...H...L...A...K...E...F...L...S...T...P...D...  
 cPIV3\_L...PMEENN...L...L...K...W...I...S...K...K...N...S...E...W...L...R...E...I...N...E...G...E...R...D...Y...G...I...M...R...P...Y...H...T...A...L...Q...I...F...G...F...Q...I...N...L...N...H...L...A...R...E...F...L...S...T...P...D...  
 hPIV1\_L...KEDSIK...I...E...K...W...I...L...V...E...K...A...K...V...H...D...W...I...V...R...E...L...K...E...G...S...A...S...S...G...M...L...R...P...Y...H...Q...A...L...Q...I...F...G...F...E...P...N...L...K...L...R...D...F...L...S...T...M...N...  
 SeV\_L...KEDSIK...I...E...K...W...I...L...I...E...K...A...K...A...H...E...W...I...T...R...E...L...R...E...S...S...S...G...M...L...R...P...Y...H...Q...A...L...Q...I...F...G...F...E...P...N...L...K...L...R...D...F...L...S...T...M...N...  
 MeV\_L...VRTSPGLIGH...L...I...S...K...Q...L...S...C...I...Q...A...I...V...G...A...V...S...R...G...D...I...N...P...I...L...K...K...L...T...P...I...E...Q...V...L...I...S...C...G...L...A...I...N...G...P...K...L...C...K...E...L...I...  
 NiV\_L...EVDNQGITSV...F...F...K...I...K...N...S...Q...K...Q...F...H...D...L...K...K...Y...Q...I...D...Q...F...F...V...T...K...I...T...S...D...E...Q...V...L...Q...A...G...L...K...L...N...G...P...E...I...L...K...S...E...I...  
 PIV5\_L...TLISPERINQ...Y...M...D...G...H...L...K...Q...E...R...I...V...A...E...A...I...D...K...V...L...G...E...N...A...L...F...N...S...D...N...E...L...I...L...K...C...G...G...T...P...N...A...R...N...L...I...D...I...E...P...  
 NDV\_L...TLIAKSD...E...T...A...L...M...A...L...F...T...S...Q...K...R...V...D...N...I...L...S...P...L...P...R...A...K...L...L...R...R...N...I...D...T...A...L...I...E...A...G...G...Q...P...V...R...P...F...C...A...E...S...L...V...N...T...  
 RSV\_L...VFN...V...Q...N...A...K...L...I...S...R...T...K...N...F...I...M...P...K...K...A...D...K...E...S...I...D...A...N...I...K...S...L...I...P...L...C...Y...P...I...  
 hMPV\_L...CHGE...I...Q...N...S...K...M...K...I...A...V...C...N...D...F...Y...A...K...K...L...D...N...K...S...I...E...A...N...C...K...S...L...L...S...G...L...R...I...  
 VSV\_L...WSS...I...N...E...S...W...K...N...L...Y...A...F...O...S...S...E...Q...E...F...A...R...A...K...K...V...S...T...Y...F...T...L...T...G...I...P...S...Q...F...I...P...D...F...F...V...N...I...E...T...M...L...Q...I...F...G...V...P...T...G...V...S...H...  
 RABV\_L...SST...L...R...E...M...S...L...V...L...F...N...C...S...S...P...K...S...E...M...O...R...A...R...S...L...N...Y...D...L...V...R...G...F...P...E...E...I...I...S...N...P...Y...N...E...M...I...T...I...D...S...D...V...E...S...F...L...V...H...

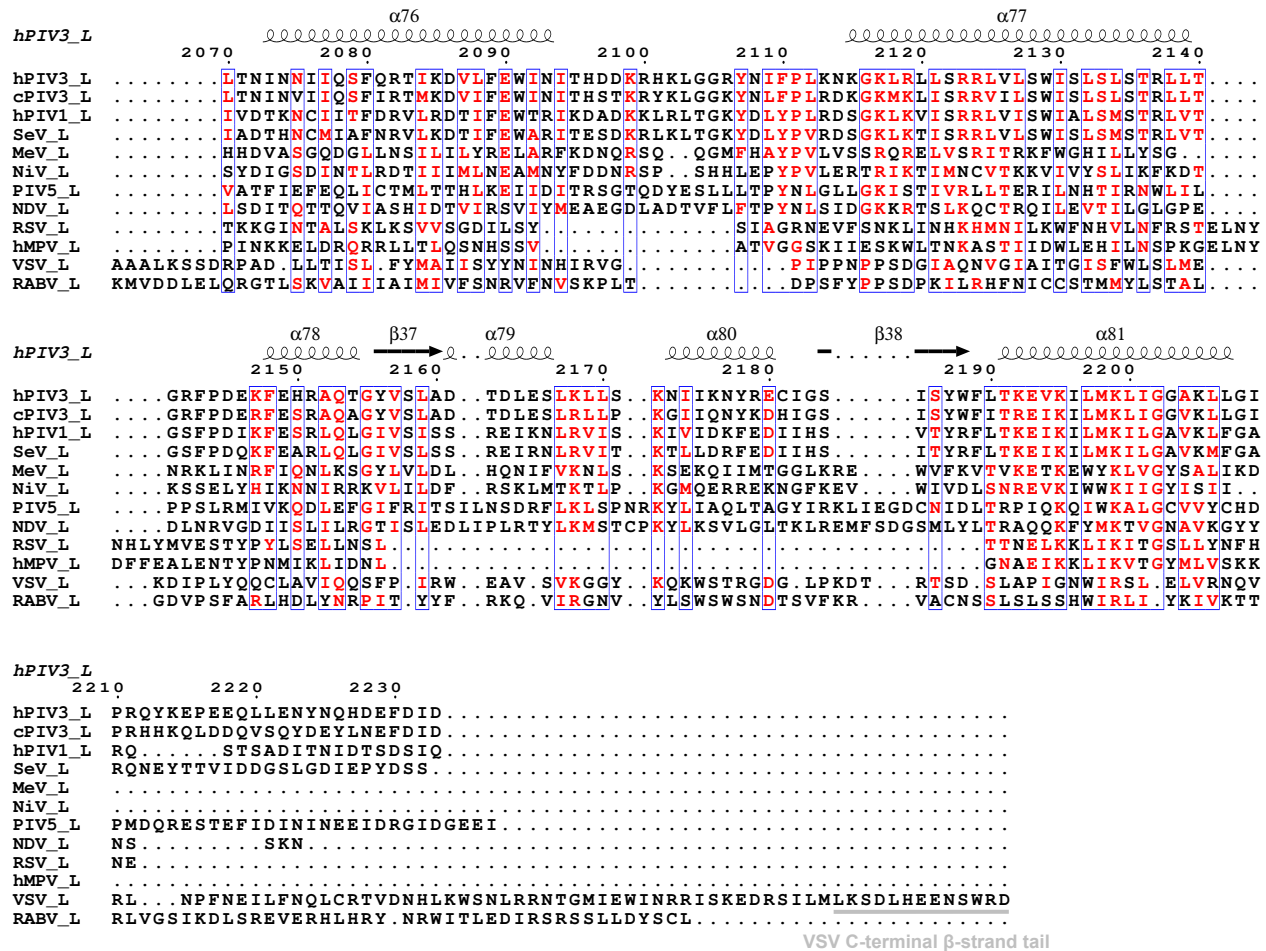

**Supplementary Fig. 4. Structure-based sequence alignment of nsNSV L proteins.**

Secondary structure elements of hPIV3 L are shown above the alignment. The presumed catalytic residues and critical residues at the RdRp active site are indicated by red stars below the alignment. The residues involved in L-L interactions of hPIV3 L are indicated by circles: residues on the RdRp and PRNTase domains of the intact L and the CD domain (CD') of the second L are colored in cyan and red, respectively; residues participated in polar and hydrophobic interactions are shown as solid and hollow circles, respectively. The basic residues that constitute the positively charged surface of CD' connected to the putative template RNA entry of the adjoining L are shown as blue stars. The residues of hPIV3 L involved in the interactions with P-OD and P-XD are indicated by pink and maroon triangles, respectively. Motifs A–G of the RdRp domain, the priming loop and intrusion loop of the PRNTase domain, the  $\beta$ -strand latch of hPIV3 L RdRp and C-terminal  $\beta$ -strand tail of VSV L CTD are labeled. The sequences of L proteins are from the following viruses: hPIV3 (NP\_067153.2), caprine parainfluenza virus 3 (cPIV3, YP\_009179212.1), human parainfluenza virus 1 (hPIV1, NP\_604442.1), Sendai virus (SeV, BAN84672.1), Measles virus (MeV, NP\_056924.1), Nipah virus (NiV, NP\_112028.1), parainfluenza virus 5 (PIV5, YP\_138518.1), Newcastle disease virus (NDV, ALP75897.1), respiratory syncytial virus (RSV, YP\_009518860.1), human metapneumovirus (hMPV, Q6WB93), vesicular stomatitis virus (VSV, NP\_041716.1) and rabies virus (RABV, ABN11300.1).

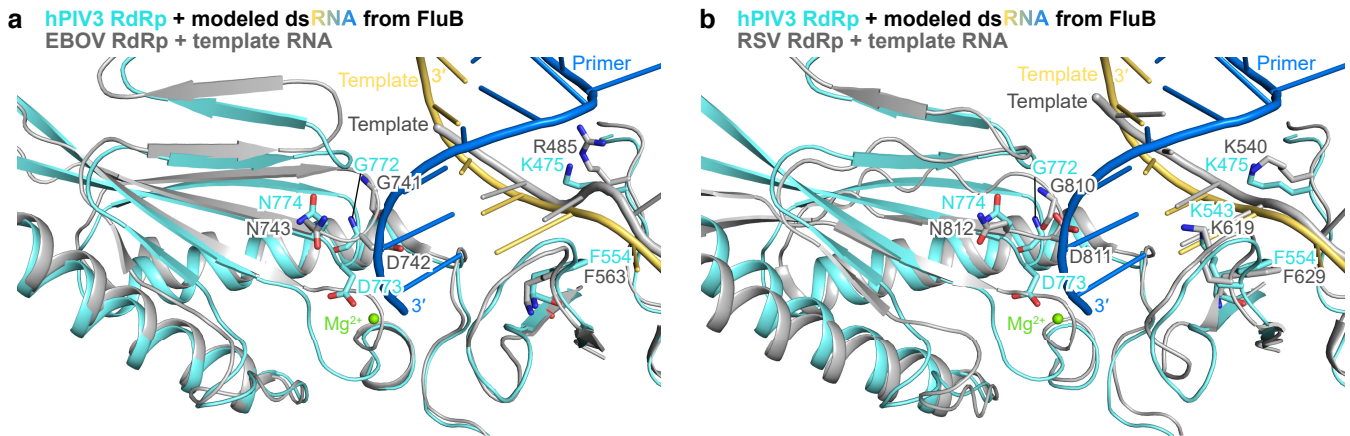

**Supplementary Fig. 5. Comparison of hPIV3 RdRp active site with modeled dsRNA to EBOV (a) and RSV (b) RdRp active site bound to the template strand RNA.**

The RdRp active site of hPIV3 L is colored in cyan, and the template and primer (product) strand RNAs of the modeled dsRNA from FluB RdRp structure (PDB 6QCX) are colored in light orange and marine blue, respectively. The RdRp active site and the template strand RNA of EBOV (PDB 8JSN) and RSV (PDB 8SNX) structures are colored in grey. Three critical residues identified in hPIV3 structure and the corresponding residues that interact with the 10-nt template strand RNA in EBOV and RSV structures, as well as the catalytic residues are shown as sticks. The magnesium ion in hPIV3 structure is shown as sphere.

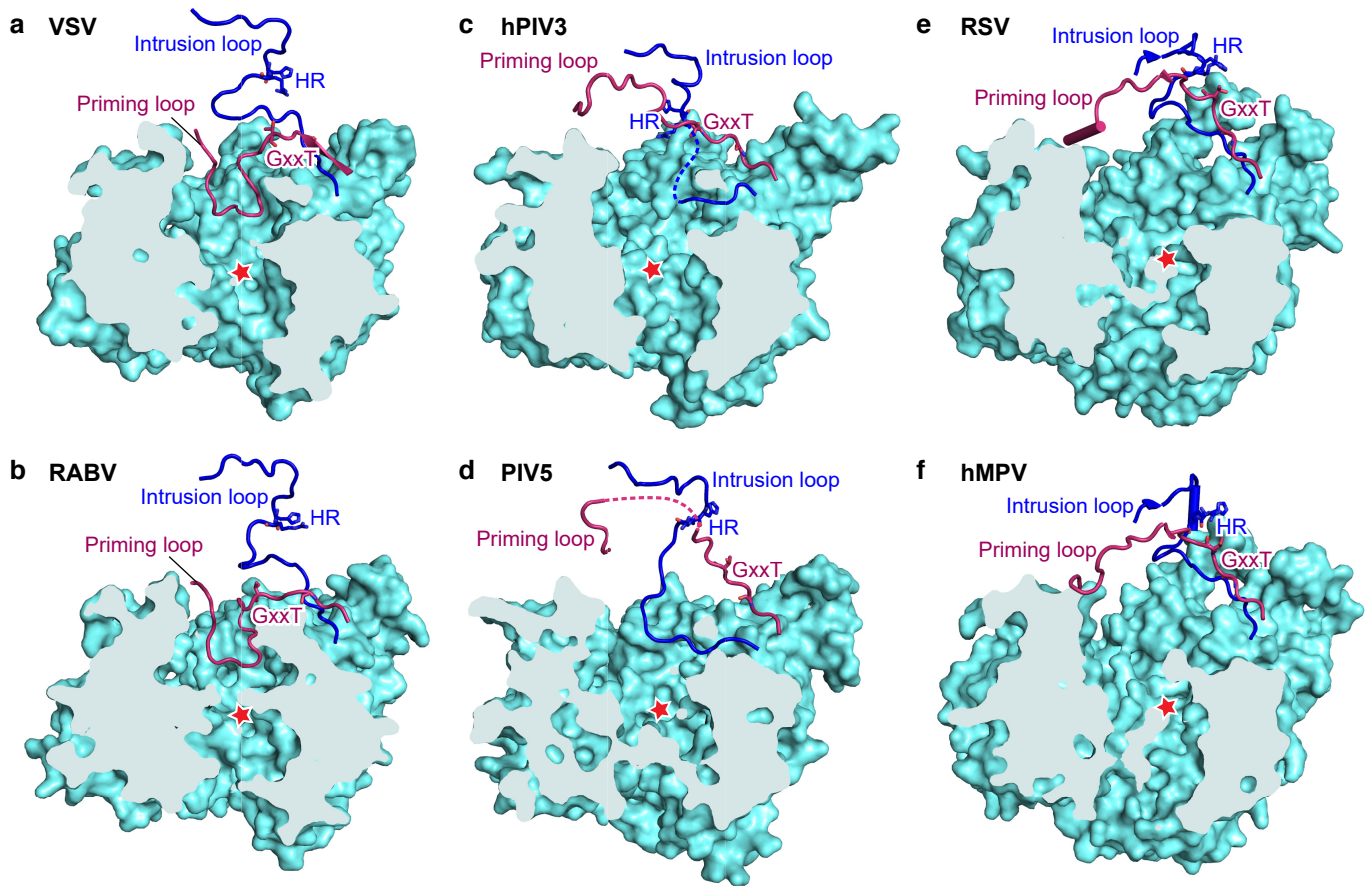

**Supplementary Fig. 6. Comparison of the putative priming loops and intrusion loops between hPIV3 and other nsNSV polymerases.**

**a** VSV (PDB 6U1X); **b** RABV (PDB 6UEB); **c** hPIV3; **d** PIV5 (PDB 6V85); **e** RSV (PDB 6PZK); **f** hMPV (PDB 6U5O). The RdRp domains are shown as aquamarine surface at the same view as in Fig. 2e, while the priming and intrusion loops in PRNTase are shown as ribbons in claret and blue, respectively. The conserved GxxT motif and HR motif are shown as sticks. The HR motif is directed towards the RNA cavity in the hPIV3 structure, but situated away from the cavity in other structures. The red star indicates the RdRp active site.

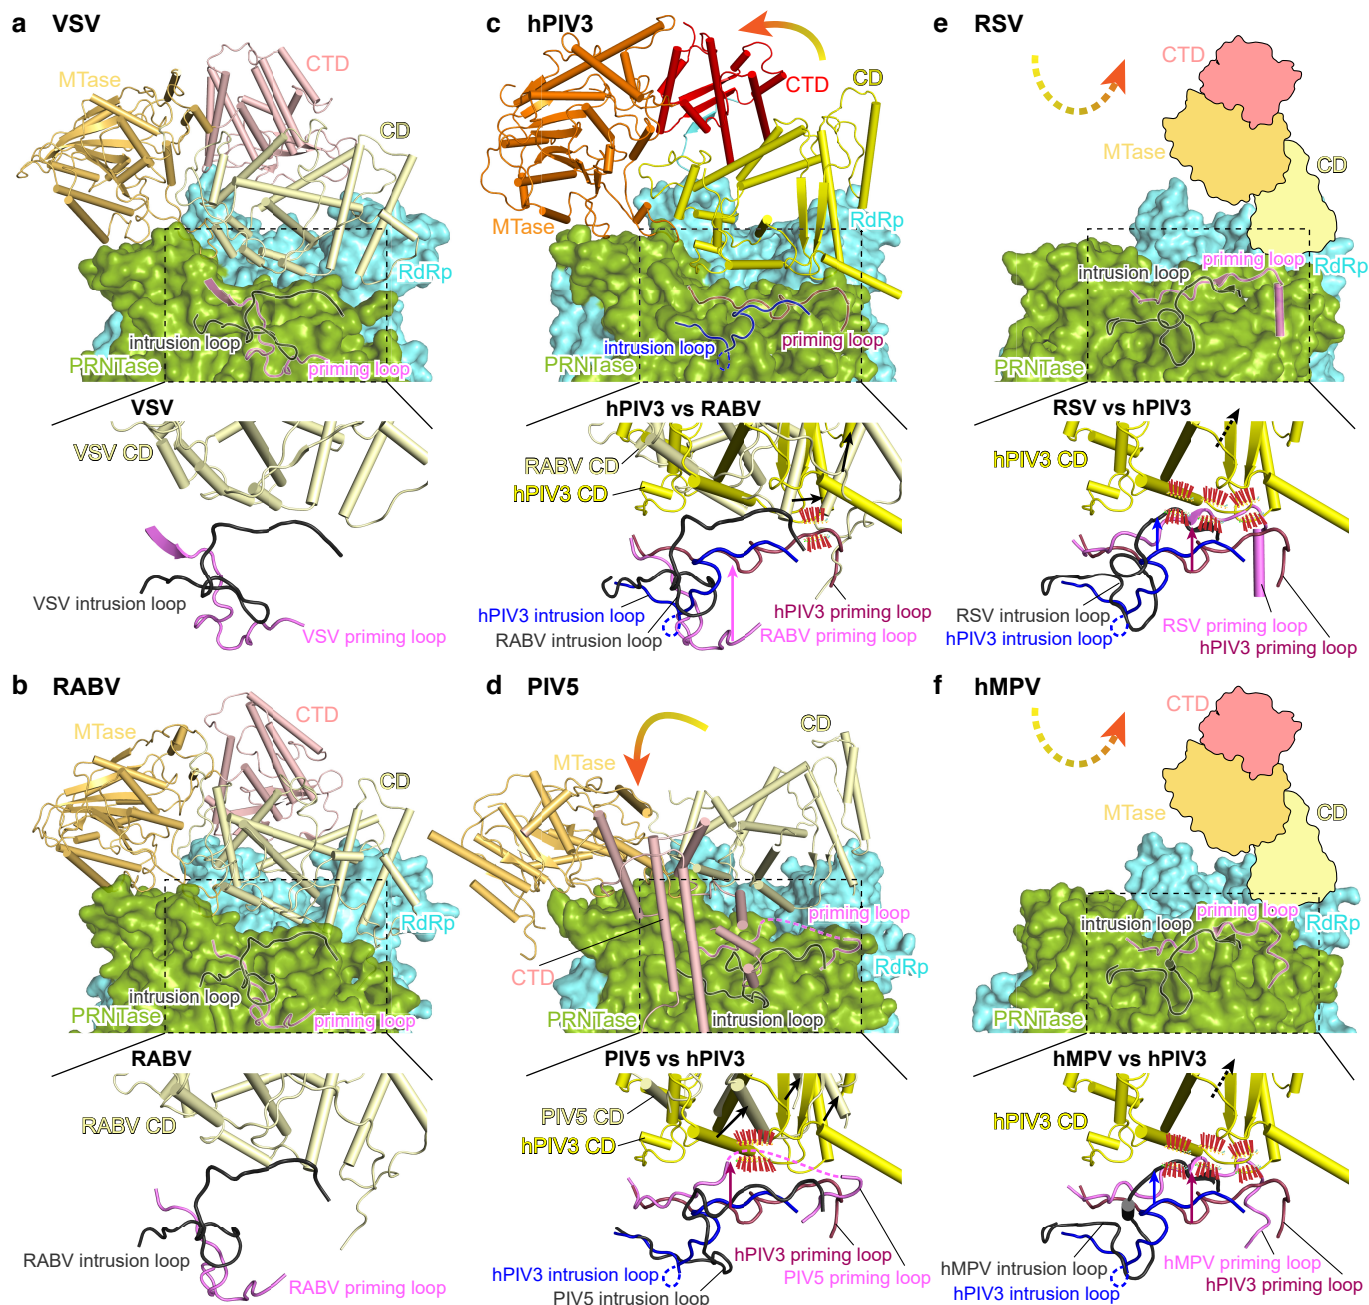

**Supplementary Fig. 7. Comparison of L CD-MTase-CTD between different nsNSVs reveals structural correlation between the conformations of priming and intrusion loops and the rearrangements of CD, MTase and CTD domains of L.**

**a** VSV (PDB 6U1X); **b** RABV (PDB 6UEB); **c** hPIV3; **d** PIV5 (PDB 6V85); **e** RSV (PDB 6PZK); **f** hMPV (PDB 6U50). The putative priming and intrusion loops and the CD domain of hPIV3 L-P structure are compared to those of RABV (**c**), with VSV structure adopting a similar conformation to RABV structure (**a**, **b**). The shifts are indicated by straight arrows, and potential steric clashes between the priming/intrusion loops of hPIV3 structure and the CD domain adopting the same conformation as RABV are indicated by red dashes. The movement of CD-MTase-CTD of hPIV3 compared to that of VSV and RABV in a pre-initiation state<sup>1-3</sup> is indicated by a curved arrow. PIV5 (**d**), RSV (**e**) and hMPV (**f**) L-P structures are compared to that of hPIV3. The CD-MTase-CTD that are invisible in RSV and hMPV L-P structures in a non-initiation state<sup>4-7</sup> are shown as cartoon models with the putative movements shown by dashed arrows.

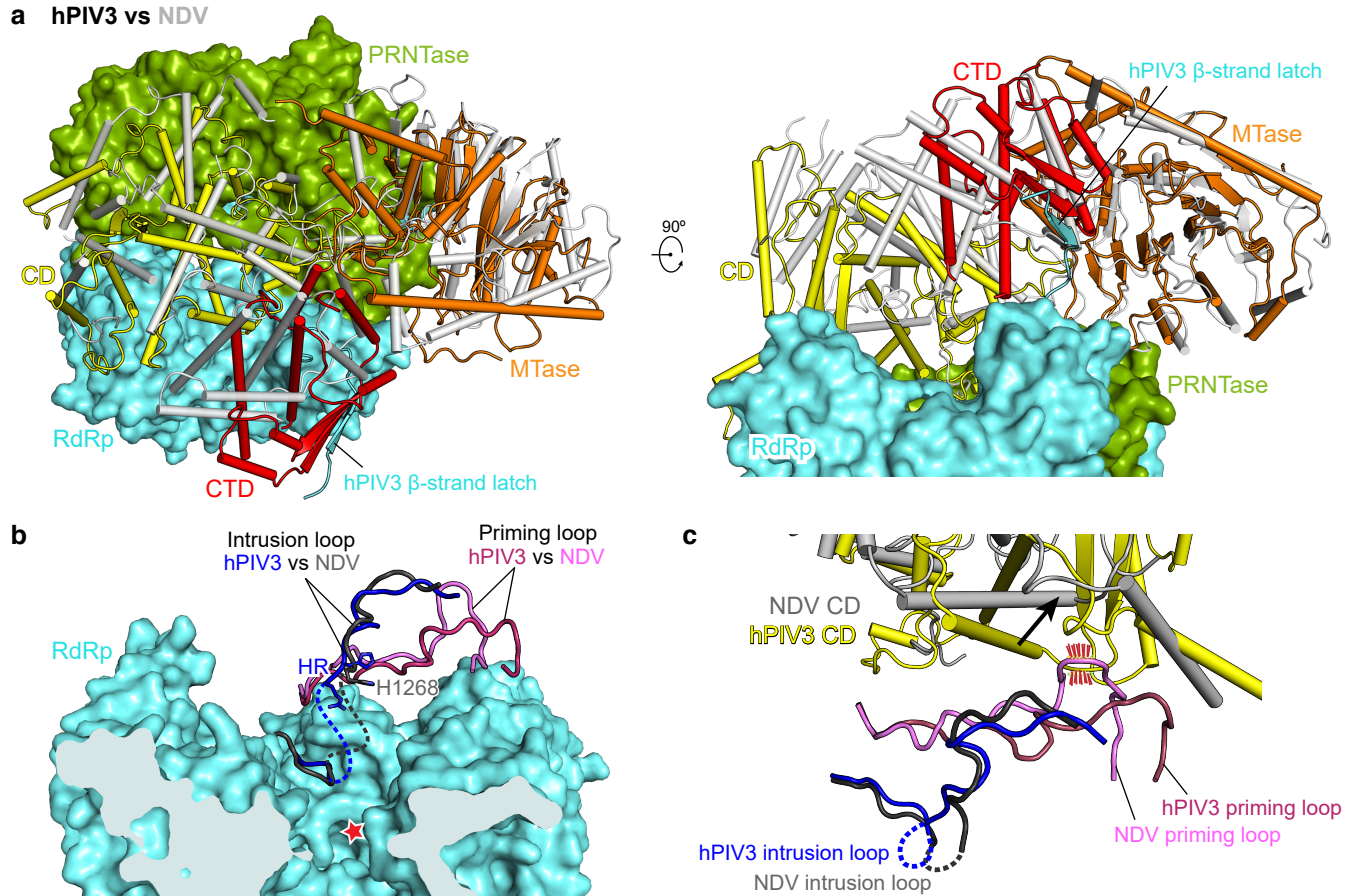

**Supplementary Fig. 8. Comparison of hPIV3 L and NDV L structures.**

**a** Comparison of CD-MTase-CTD of hPIV3 (yellow-orange-red) and NDV (PDB 7YOU) (grey). The RdRp-PRNTase domains of hPIV3 and NDV are superimposed and only the hPIV3 RdRp-PRNTase are shown as surface. The  $\beta$ -strand latch of hPIV3 L RdRp is labeled. Rotated view by  $90^\circ$  about the x axis is shown in the right panel. **b** Comparison of the putative priming loops and intrusion loops between hPIV3 and NDV. The disordered regions of the loops are shown as dotted lines. Only His1268 residue of the HR motif of NDV L was built in the EM density map. The hPIV3 RdRp is shown as surface. The red star indicates the RdRp active site. **c** The interactions between the putative priming/intrusion loops and CD. Potential steric clash between NDV priming loop and the CD adopting the same conformation as hPIV3 is indicated by red dashes. The movement is indicated by an arrow.

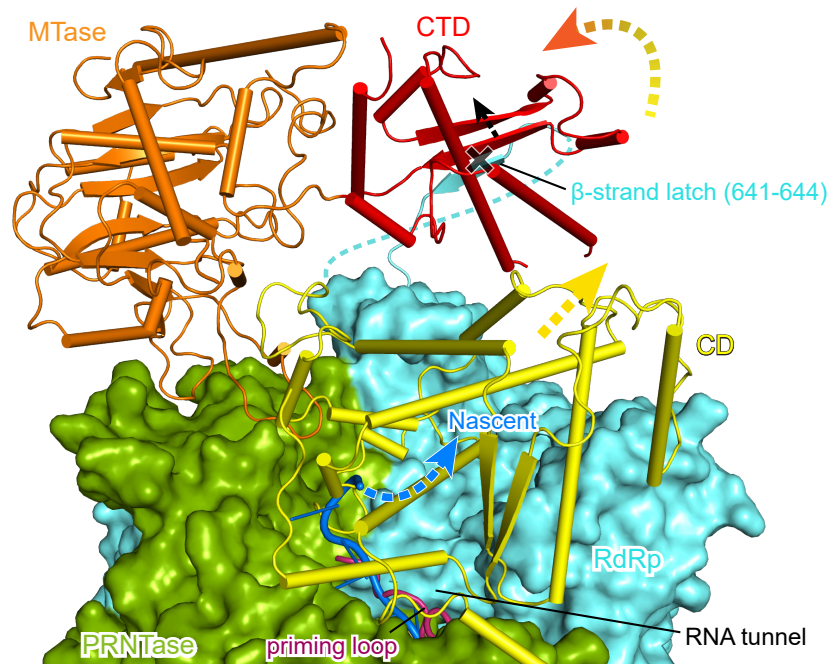

**Supplementary Fig. 9. The modeling reveals disruption of the short  $\beta$ -sheet formed with the  $\beta$ -strand latch during elongation.**

The domains of hPIV3 L are colored as depicted in Fig. 1a. RdRp and PRNTase domains are shown as surface, while other domains are shown as ribbons. The  $\beta$ -strand latch (Phe641–Lys644) extended from RdRp is labeled, and the disordered region followed by the  $\beta$ -strand latch is shown as a dotted line. The nascent RNA modeled from FluB RdRp structure (PDB 6QCX) is colored in marine blue, and the elongation from the RNA tunnel is indicated by a blue dashed arrow. The part that affects the nascent RNA exit in the priming loop is omitted from the PRNTase surface and shown as ribbons. The shift of the CD domain and the potential movement of CD-MTase-CTD for RNA tunnel opening during elongation are indicated by thick dashed arrows. The disruption of the short  $\beta$ -sheet formed between the  $\beta$ -strand latch and CTD is indicated by a black cross and dashed arrow.





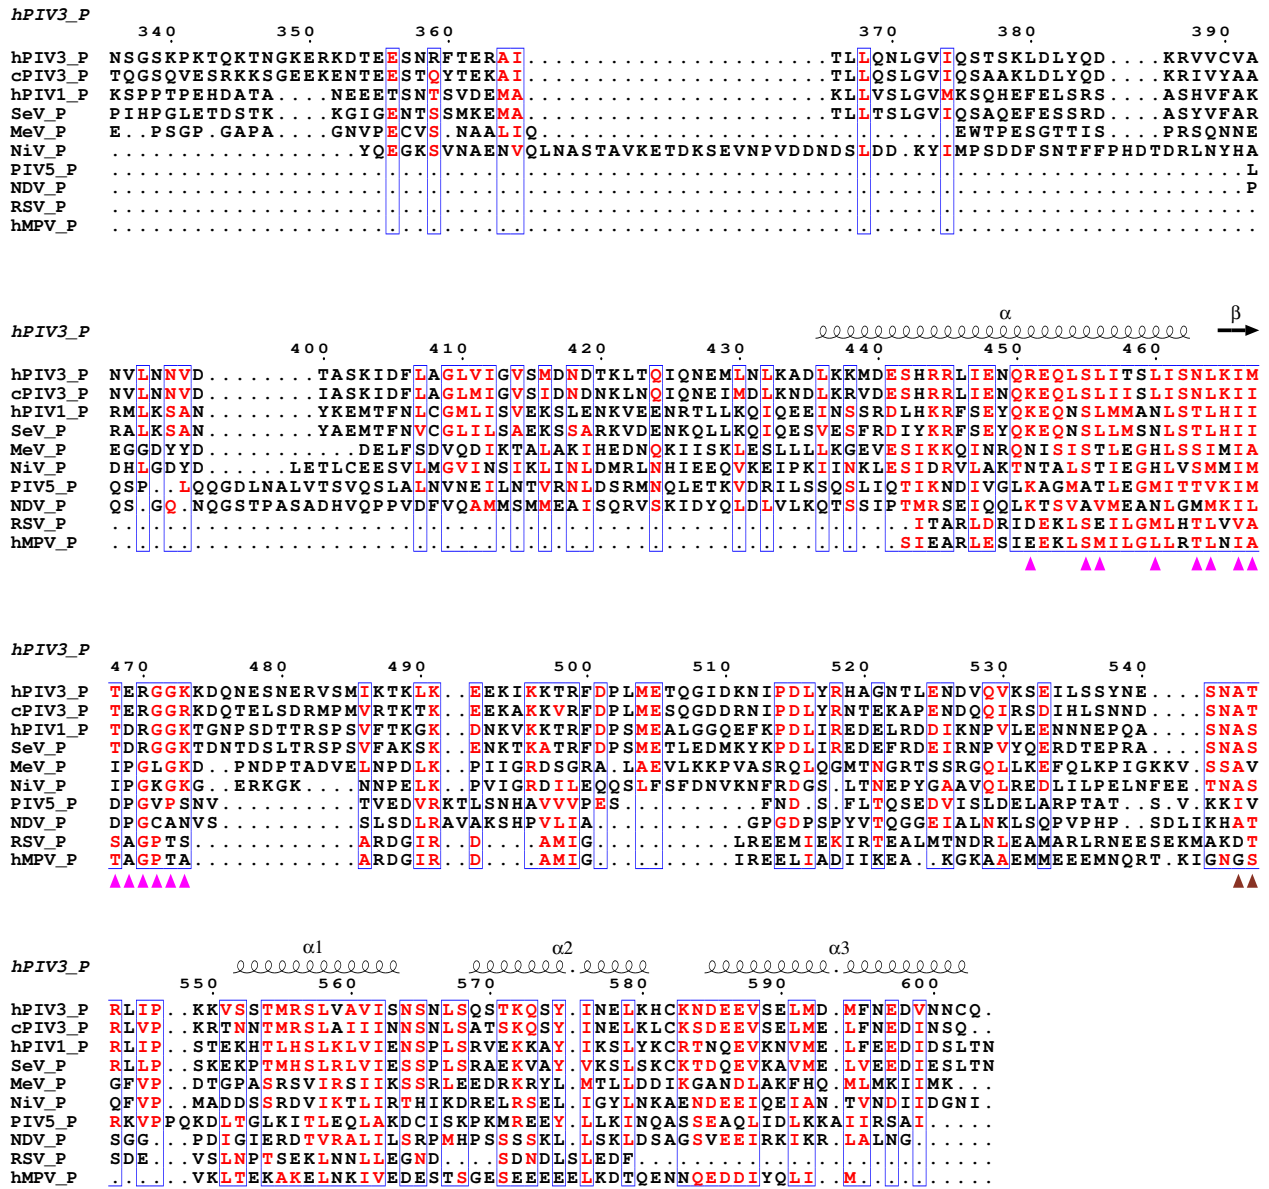

**Supplementary Fig. 10. Structure-based sequence alignment of nsNSV P proteins.**

Secondary structure elements of hPIV3 P (P4-OD and single XD) are shown above the alignment. The residues of hPIV3 P-OD and P-XD involved in the interactions with L are indicated by pink and maroon triangles, respectively. The sequences of P proteins are from the following viruses: hPIV3 (NP\_067149.1), cPIV3 (YP\_009179208.1), hPIV1 (NP\_604435.1), SeV (BAN84668.1), MeV (NP\_056919.1), NiV (NP\_112022.1), PIV5 (YP\_138512.1), NDV (ALP75892.1), RSV (YP\_009518853.1) and hMPV (Q8B9Q8).

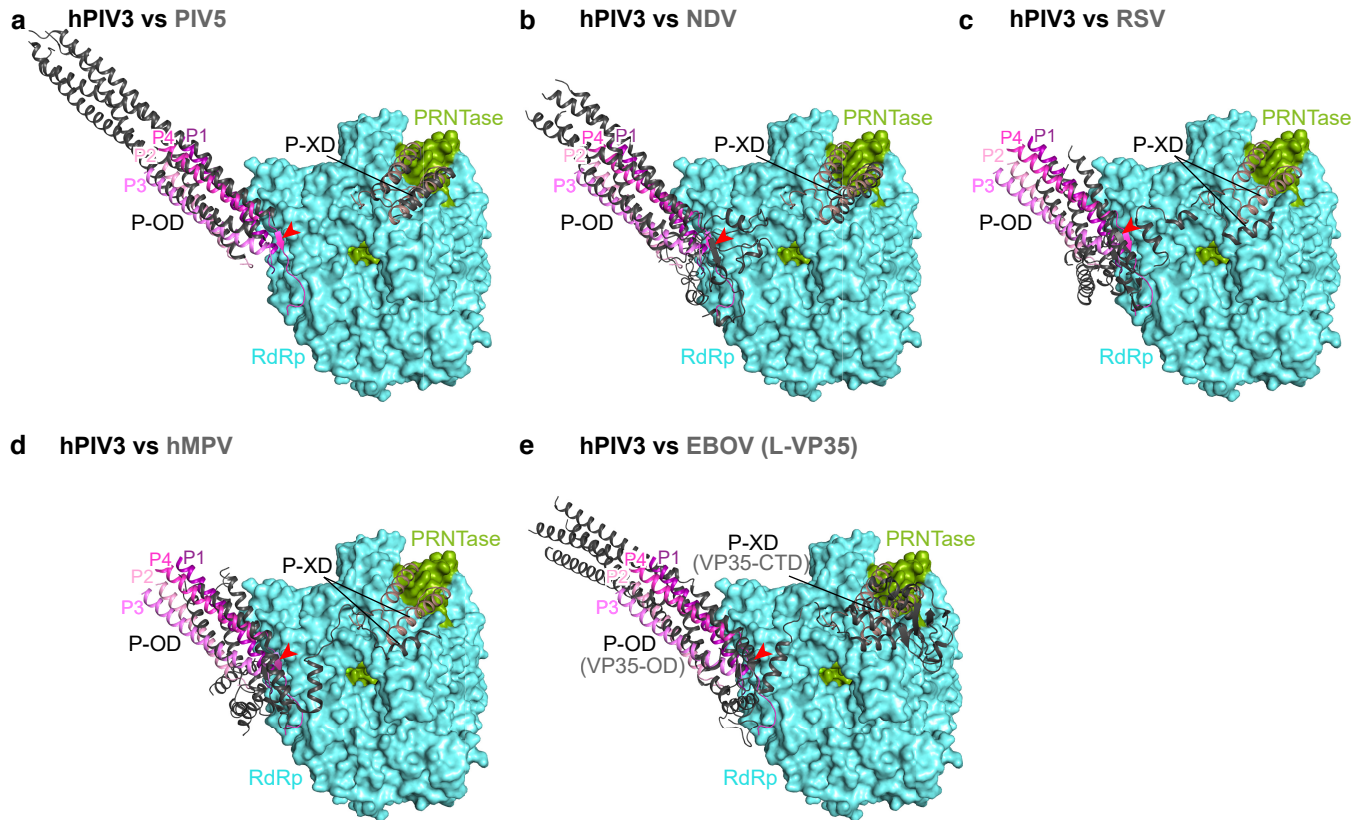

**Supplementary Fig. 11. Comparison of L-P binding between hPIV3 and other nsNSVs including PIV5 (a), NDV (b), RSV (c), hMPV (d) and EBOV (L-VP35) (e).**

The RdRp and PRNTase structures of PIV5 (PDB 6V85), NDV (PDB 7YOV), RSV (PDB 6PZK), hMPV (PDB 6U5O) and EBOV (PDB 7YES) are superimposed to that of hPIV3 with surfaces of hPIV3 RdRp and PRNTase shown. HPIV3 L and P are colored as depicted in Fig. 4a, while P or VP35 proteins of other nsNSVs are colored in dark grey. Both OD and XD domains of hPIV3, PIV5 and NDV P proteins as well as the OD and CTD domains of EBOV VP35 adopt similar conformations and bind to the same approximate positions on L (a, b and e). RSV and hMPV also dock the tetrameric helical OD domains of P on the L surface like hPIV3 and extend their C-terminal helices of one monomer to roughly the same position as hPIV3 P-XD (c, d). Red arrows indicate the typical antiparallel  $\beta$ -sheet between L and P-OD shared among hPIV3, NDV, RSV, hMPV and EBOV (between L and VP35-OD), while it was not resolved in PIV5 structure due to low resolution.

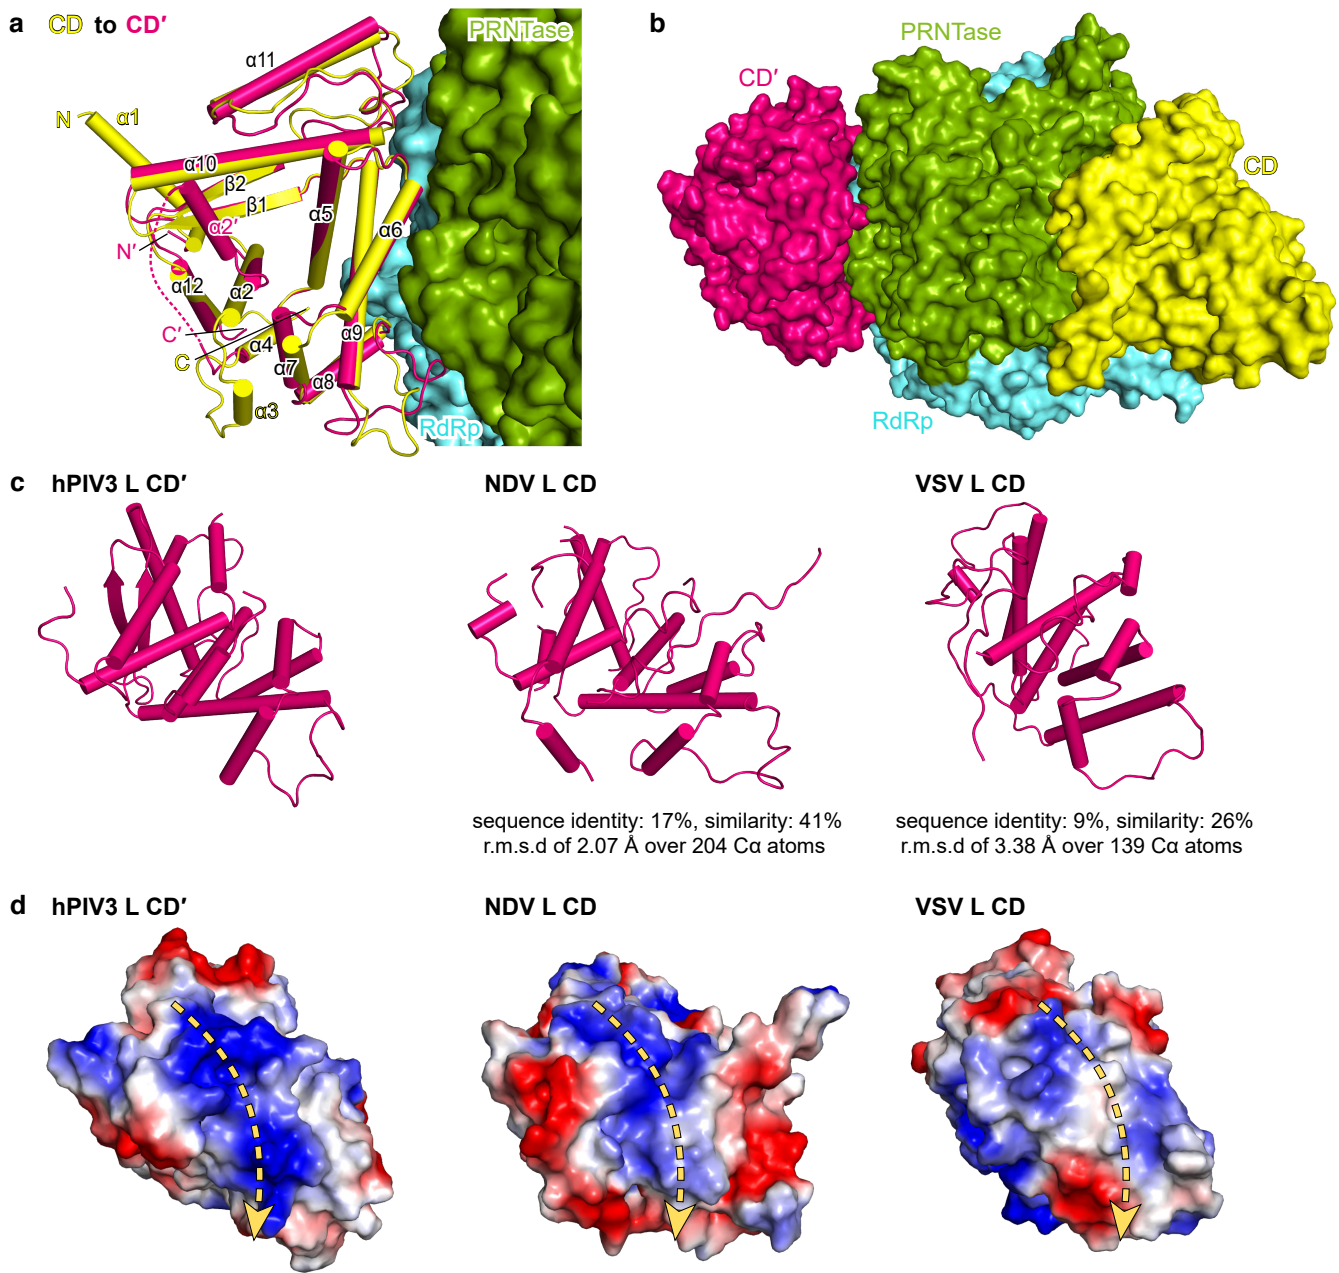

**Supplementary Fig. 12. The CD domain (CD') of the second L of hPIV3.**

**a** CD is superimposed to CD' with the secondary structure elements and both N and C termini labeled, and RdRp and PRNTase domains shown as surface. The first  $\alpha$ -helix ( $\alpha 1$ ) is invisible in CD'. The disordered region containing the missing short helix  $\alpha 3$  of CD' is shown as a dotted line. The major structural differences are the loops between  $\alpha 8/\alpha 9$  and  $\alpha 11/\beta 2$  at the L-L interface and the bent helix  $\alpha 2$  of CD' ( $\alpha 2'$ ). **b** Two CD domains located at both sides of RdRp-PRNTase of L. All domains are shown as surface. **c** Structural similarity between hPIV3 L CD' (left) and the CD domains of another paramyxovirus NDV L (PDB 7YOU) and the rhabdovirus VSV L (PDB 6U1X). Structures were superimposed to CD' of hPIV3 L, and the r.m.s.d value and residue coverage are marked. The sequence identities and similarities of the CD domains compared to that of hPIV3 are also shown. **d** The positively charged surface on CD' of hPIV3 L (left) and the comparable surface on the CD domains of NDV L and VSV L at the same top view as in Fig. 7f. The putative RNA paths are indicated by dashed arrows.

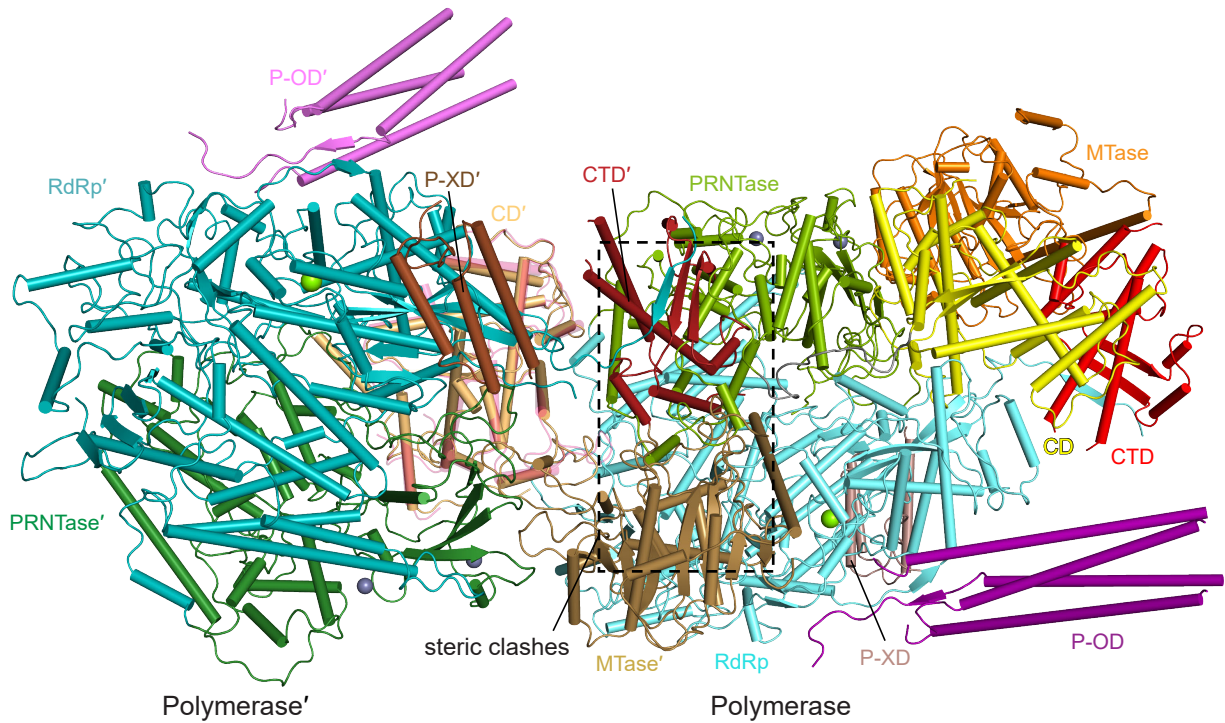

**Supplementary Fig. 13. The captured hPIV3 L-P dimer should not be symmetric.**

Dimer modeling using two same hPIV3 L-P monomers by superposition of the CD domain of the second L-P to the second CD (CD') in the incomplete dimeric hPIV3 L-P structure showed that two L-P monomers have serious steric clashes, shown in the dashed box. The original L-P of Polymerase is colored as depicted in Fig. 1a, while the superimposed L-P of Polymerase' is drawn in close colors.

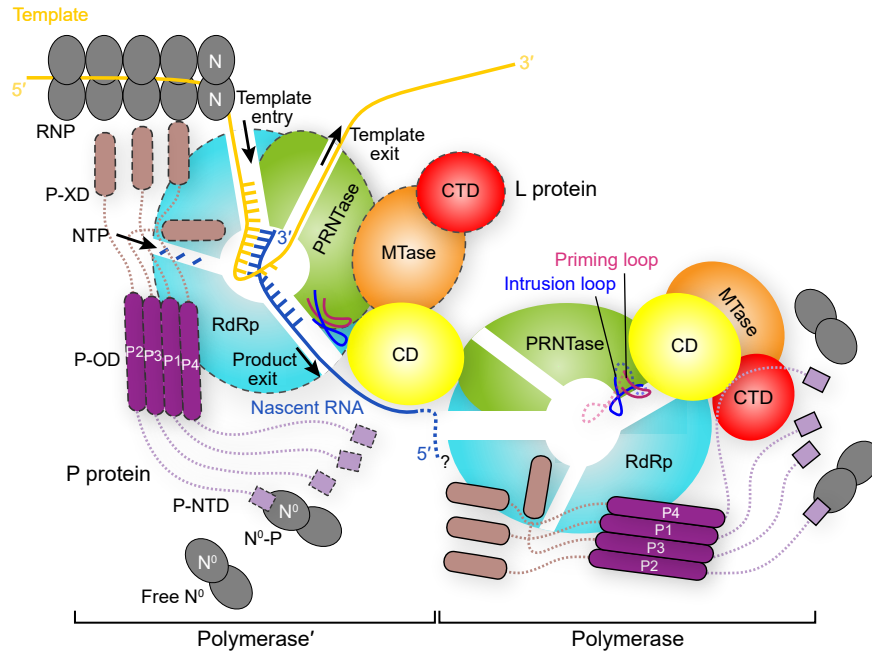

**Supplementary Fig. 14. The dimeric L-P polymerase model in RNA replication.**

Schematic diagram illustrating a speculative model for the function of the dimeric L-P polymerase. In this schematic diagram, the right-hand polymerase represents the L-P complex for which an almost intact structure was obtained by cryo-EM, and the left-hand polymerase represents the L-P complex for which most parts were unresolved, except for the CD domain. It should be noted that the cartoon is not a precise 2D projection but is a “flattened” representation so that the RNA and NTP channels of both polymerases could be depicted. According to this model, the left-hand polymerase (Polymerase') contacts the template and synthesizes RNA. The retracted priming loop into the cavity of the PRNTase, together with the intrusion loop, pushes away the CD with dramatic movement of the adjacent C-terminal MTase-CTD, resulting in a dynamic structure. The opening of the product exit channel allows nascent RNA to travel along the positively charged surface of CD' towards the right-hand polymerase. The right-hand polymerase might play a role in encapsidating the RNA in the presence of soluble  $N^0$ , although the site of encapsidation is not known (as indicated with a dotted line and a question mark). In this model, the unresolved parts of the left-hand polymerase in the dimeric hPIV3 L-P cryo-EM structure are highlighted by dashed strokes. The putative priming and intrusion loops in pre-initiation state are indicated by dashed transparent lines. For simplicity, soluble  $N^0$  is shown in the free state, but in infected cells, it would likely be in an  $N^0$ -P complex.

**Supplementary Table 1. Cryo-EM data collection, structure refinement and model statistics**

|                                                     | hPIV3 L:P complex<br>class 1 (incomplete<br>dimeric form) | hPIV3 L:P complex<br>class 2 (monomeric form) |
|-----------------------------------------------------|-----------------------------------------------------------|-----------------------------------------------|
| <b>PDB entry</b>                                    | 8KDB                                                      | 8KDC                                          |
| <b>EMDB entry</b>                                   | EMD-37130                                                 | EMD-37131                                     |
| <b>Data collection and processing</b>               |                                                           |                                               |
| Magnification                                       | 81,000                                                    | 81,000                                        |
| Voltage (kV)                                        | 300                                                       | 300                                           |
| Electron exposure (e <sup>-</sup> /Å <sup>2</sup> ) | 50                                                        | 50                                            |
| Defocus range (μm)                                  | -1.5 to -2.0                                              | -1.5 to -2.0                                  |
| Pixel size (Å)                                      | 1.087                                                     | 1.087                                         |
| Symmetry imposed                                    | C1                                                        | C1                                            |
| Initial particles (no.)                             | 3,288,374                                                 | 3,288,374                                     |
| Final particles (no.)                               | 102,956                                                   | 137,294                                       |
| Map resolution (Å)                                  | 2.7                                                       | 3.3                                           |
| FSC threshold                                       | 0.143                                                     | 0.143                                         |
| Map resolution range (Å)                            | ∞-2.7                                                     | ∞-3.3                                         |
| <b>Refinement</b>                                   |                                                           |                                               |
| Initial model used (PDB code)                       | 6V85                                                      | 6V85                                          |
| Map sharpening <i>B</i> factor (Å <sup>2</sup> )    | -45                                                       | -109                                          |
| Model composition                                   |                                                           |                                               |
| Non-hydrogen atoms                                  | 20,861                                                    | 18,808                                        |
| Protein residues                                    | 2,584                                                     | 2,329                                         |
| Ligands                                             | Mg <sup>2+</sup> (1), Zn <sup>2+</sup> (2)                | Mg <sup>2+</sup> (1), Zn <sup>2+</sup> (2)    |
| <i>B</i> factors (Å <sup>2</sup> )                  |                                                           |                                               |
| Protein                                             | 70.77                                                     | 92.68                                         |
| Ligand                                              | 70.00                                                     | 104.78                                        |
| R.m.s. deviations                                   |                                                           |                                               |
| Bond lengths (Å)                                    | 0.003                                                     | 0.003                                         |
| Bond angles (°)                                     | 0.525                                                     | 0.495                                         |
| Validation                                          |                                                           |                                               |
| MolProbity score                                    | 1.28                                                      | 1.48                                          |
| Clashscore                                          | 5.27                                                      | 6.45                                          |
| Poor rotamers (%)                                   | 0.04                                                      | 0.05                                          |
| Ramachandran plot                                   |                                                           |                                               |
| Favored (%)                                         | 98.01                                                     | 97.36                                         |
| Allowed (%)                                         | 1.99                                                      | 2.64                                          |
| Disallowed (%)                                      | 0.00                                                      | 0.00                                          |

## Supplementary references

1. Liang, B. *et al.* Structure of the L protein of vesicular stomatitis virus from electron cryomicroscopy. *Cell* **162**, 314–327 (2015).
2. Jenni, S. *et al.* Structure of the vesicular stomatitis virus L protein in complex with its phosphoprotein cofactor. *Cell Rep.* **30**, 53-60.e5 (2020).
3. Horwitz, J. A., Jenni, S., Harrison, S. C. & Whelan, S. P. J. Structure of a rabies virus polymerase complex from electron cryo-microscopy. *Proc. Natl. Acad. Sci. U. S. A.* **117**, 2099–2107 (2020).
4. Pan, J. *et al.* Structure of the human metapneumovirus polymerase phosphoprotein complex. *Nature* **577**, 275–279 (2020).
5. Gilman, M. S. A. *et al.* Structure of the respiratory syncytial virus polymerase complex. *Cell* **179**, 193-204.e14 (2019).
6. Te Velthuis, A. J. W., Grimes, J. M. & Fodor, E. Structural insights into RNA polymerases of negative-sense RNA viruses. *Nat. Rev. Microbiol.* **19**, 303–318 (2021).
7. Cao, D. *et al.* Cryo-EM structure of the respiratory syncytial virus RNA polymerase. *Nat. Commun.* **11**, 1–9 (2020).
