# Supplementary material for: Structural basis for dimerization of a paramyxovirus polymerase complex
Source: PubMed Central journal article supplement (PMC11009304; doi:10.1038/s41467-024-47470-7), 2024-04-11
Supplement: 41467_2024_47470_MOESM3_ESM.pdf [file 41467_2024_47470_MOESM3_ESM.pdf]

## Reporting Summary

Nature Portfolio wishes to improve the reproducibility of the work that we publish. This form provides structure for consistency and transparency in reporting. For further information on Nature Portfolio policies, see our [Editorial Policies](#) and the [Editorial Policy Checklist](#).

### Statistics

For all statistical analyses, confirm that the following items are present in the figure legend, table legend, main text, or Methods section.

- | n/a                                 | Confirmed                                                                                                                                                                                                                                                                                      |
|-------------------------------------|------------------------------------------------------------------------------------------------------------------------------------------------------------------------------------------------------------------------------------------------------------------------------------------------|
| <input type="checkbox"/>            | <input checked="" type="checkbox"/> The exact sample size ( $n$ ) for each experimental group/condition, given as a discrete number and unit of measurement                                                                                                                                    |
| <input type="checkbox"/>            | <input checked="" type="checkbox"/> A statement on whether measurements were taken from distinct samples or whether the same sample was measured repeatedly                                                                                                                                    |
| <input checked="" type="checkbox"/> | <input type="checkbox"/> The statistical test(s) used AND whether they are one- or two-sided<br><i>Only common tests should be described solely by name; describe more complex techniques in the Methods section.</i>                                                                          |
| <input checked="" type="checkbox"/> | <input type="checkbox"/> A description of all covariates tested                                                                                                                                                                                                                                |
| <input checked="" type="checkbox"/> | <input type="checkbox"/> A description of any assumptions or corrections, such as tests of normality and adjustment for multiple comparisons                                                                                                                                                   |
| <input type="checkbox"/>            | <input checked="" type="checkbox"/> A full description of the statistical parameters including central tendency (e.g. means) or other basic estimates (e.g. regression coefficient) AND variation (e.g. standard deviation) or associated estimates of uncertainty (e.g. confidence intervals) |
| <input checked="" type="checkbox"/> | <input type="checkbox"/> For null hypothesis testing, the test statistic (e.g. $F$ , $t$ , $r$ ) with confidence intervals, effect sizes, degrees of freedom and $P$ value noted<br><i>Give <math>P</math> values as exact values whenever suitable.</i>                                       |
| <input checked="" type="checkbox"/> | <input type="checkbox"/> For Bayesian analysis, information on the choice of priors and Markov chain Monte Carlo settings                                                                                                                                                                      |
| <input checked="" type="checkbox"/> | <input type="checkbox"/> For hierarchical and complex designs, identification of the appropriate level for tests and full reporting of outcomes                                                                                                                                                |
| <input checked="" type="checkbox"/> | <input type="checkbox"/> Estimates of effect sizes (e.g. Cohen's $d$ , Pearson's $r$ ), indicating how they were calculated                                                                                                                                                                    |

*Our web collection on [statistics for biologists](#) contains articles on many of the points above.*

### Software and code

Policy information about [availability of computer code](#)

|                 |                                                                                                                                                                                       |
|-----------------|---------------------------------------------------------------------------------------------------------------------------------------------------------------------------------------|
| Data collection | AutoEMation                                                                                                                                                                           |
| Data analysis   | RELION 3.1, cryoSPARC 3.1.0, Coot 0.9, PHENIX (version dev-4230), UCSF Chimera 1.13.1 and ChimeraX, PyMOL 1.8, MolProbity 4.5, Multalin 5.4.1, PROMALS3D, GraphPad Prism 8, ASTRA 6.1 |

For manuscripts utilizing custom algorithms or software that are central to the research but not yet described in published literature, software must be made available to editors and reviewers. We strongly encourage code deposition in a community repository (e.g. GitHub). See the Nature Portfolio [guidelines for submitting code & software](#) for further information.

### Data

Policy information about [availability of data](#)

All manuscripts must include a [data availability statement](#). This statement should provide the following information, where applicable:

- Accession codes, unique identifiers, or web links for publicly available datasets
- A description of any restrictions on data availability
- For clinical datasets or third party data, please ensure that the statement adheres to our [policy](#)

All data supporting the findings of this study are available in the manuscript and the supplementary materials. Source data are provided with this paper. The cryo-EM density maps generated in this study have been deposited in the Electron Microscopy Data Bank (EMDB) under accession codes EMD-37130 [<https://www.ebi.ac.uk/emdb/EMD-37130>] (hPIV3 L-P class 1, incomplete dimeric form) and EMD-37131 [<https://www.ebi.ac.uk/emdb/EMD-37131>] (hPIV3 L-P class 2, monomeric form). The corresponding atomic coordinates have been deposited in the Protein Data Bank (PDB) under accession codes 8KDB [<https://>

doi.org/10.2210/pdb8kdb/pdb] (hPIV3 L-P class 1, incomplete dimeric form) and 8KDC [https://doi.org/10.2210/pdb8kdc/pdb] (hPIV3 L-P class 2, monomeric form). The previously published structures used for comparison and analysis in this study are available in the PDB under the following accession codes: 6PZK [https://doi.org/10.2210/pdb6pzk/pdb], 6QCX [https://doi.org/10.2210/pdb6qcx/pdb], 6U1X [https://doi.org/10.2210/pdb6u1x/pdb], 6U5O [https://doi.org/10.2210/pdb6u5o/pdb], 6UEB [https://doi.org/10.2210/pdb6ueb/pdb], 6V85 [https://doi.org/10.2210/pdb6v85/pdb], 7BV2 [https://doi.org/10.2210/pdb7bv2/pdb], 7YES [https://doi.org/10.2210/pdb7yes/pdb], 7YOU [https://doi.org/10.2210/pdb7you/pdb], 7YOV [https://doi.org/10.2210/pdb7yov/pdb], 8JSN [https://doi.org/10.2210/pdb8jsn/pdb] and 8SNX [https://doi.org/10.2210/pdb8snx/pdb].

## Research involving human participants, their data, or biological material

Policy information about studies with [human participants or human data](#). See also policy information about [sex, gender \(identity/presentation\), and sexual orientation](#) and [race, ethnicity and racism](#).

|                                                                    |     |
|--------------------------------------------------------------------|-----|
| Reporting on sex and gender                                        | N/A |
| Reporting on race, ethnicity, or other socially relevant groupings | N/A |
| Population characteristics                                         | N/A |
| Recruitment                                                        | N/A |
| Ethics oversight                                                   | N/A |

Note that full information on the approval of the study protocol must also be provided in the manuscript.

## Field-specific reporting

Please select the one below that is the best fit for your research. If you are not sure, read the appropriate sections before making your selection.

Life sciences  Behavioural & social sciences  Ecological, evolutionary & environmental sciences

For a reference copy of the document with all sections, see [nature.com/documents/nr-reporting-summary-flat.pdf](https://www.nature.com/documents/nr-reporting-summary-flat.pdf)

## Life sciences study design

All studies must disclose on these points even when the disclosure is negative.

|                 |                                                                                                                                                                                                                                                                                                                                                                                                                                                                |
|-----------------|----------------------------------------------------------------------------------------------------------------------------------------------------------------------------------------------------------------------------------------------------------------------------------------------------------------------------------------------------------------------------------------------------------------------------------------------------------------|
| Sample size     | A total number of 5,800 cryo-EM movie stacks were collected. 5,693 micrographs were selected for subsequent processing, and 102,956 and 137,294 particles were extracted for reconstruction of the high-resolution cryo-EM maps of hPIV3 L-P class 1 (incomplete dimeric form, 2.7 Å) and class 2 (monomeric form, 3.3 Å), respectively. The functional data were generated from two or three independent experiments as described in relevant figure legends. |
| Data exclusions | Following the first steps of cryo-EM data processing, some cryo-EM micrographs with poor quality were discarded.                                                                                                                                                                                                                                                                                                                                               |
| Replication     | All functional assays were carried out at least two times and produced similar results.                                                                                                                                                                                                                                                                                                                                                                        |
| Randomization   | For cryo-EM data processing, the datasets were randomly split into two halves for unbiased 3D reconstruction. The biochemical and cellular assays in this study do not involve randomization, as they do not contain experiments with groups of individuals.                                                                                                                                                                                                   |
| Blinding        | Blinding is unnecessary and not applicable for cryo-EM structure determination and in vitro assays in this study.                                                                                                                                                                                                                                                                                                                                              |

## Reporting for specific materials, systems and methods

We require information from authors about some types of materials, experimental systems and methods used in many studies. Here, indicate whether each material, system or method listed is relevant to your study. If you are not sure if a list item applies to your research, read the appropriate section before selecting a response.

### Materials & experimental systems

| n/a                                 | Involved in the study                                     |
|-------------------------------------|-----------------------------------------------------------|
| <input type="checkbox"/>            | <input checked="" type="checkbox"/> Antibodies            |
| <input type="checkbox"/>            | <input checked="" type="checkbox"/> Eukaryotic cell lines |
| <input checked="" type="checkbox"/> | <input type="checkbox"/> Palaeontology and archaeology    |
| <input checked="" type="checkbox"/> | <input type="checkbox"/> Animals and other organisms      |
| <input checked="" type="checkbox"/> | <input type="checkbox"/> Clinical data                    |
| <input checked="" type="checkbox"/> | <input type="checkbox"/> Dual use research of concern     |
| <input checked="" type="checkbox"/> | <input type="checkbox"/> Plants                           |

### Methods

| n/a                                 | Involved in the study                           |
|-------------------------------------|-------------------------------------------------|
| <input checked="" type="checkbox"/> | <input type="checkbox"/> ChIP-seq               |
| <input checked="" type="checkbox"/> | <input type="checkbox"/> Flow cytometry         |
| <input checked="" type="checkbox"/> | <input type="checkbox"/> MRI-based neuroimaging |

## Antibodies

|                 |                                                                                                                                                                                                                                                                                                                                                                                                                                                                                                                                                                                                                                                                                                                                                                                                                                                                                                                                                                                                                                                                                                                                                                                                                                                                                                                                          |
|-----------------|------------------------------------------------------------------------------------------------------------------------------------------------------------------------------------------------------------------------------------------------------------------------------------------------------------------------------------------------------------------------------------------------------------------------------------------------------------------------------------------------------------------------------------------------------------------------------------------------------------------------------------------------------------------------------------------------------------------------------------------------------------------------------------------------------------------------------------------------------------------------------------------------------------------------------------------------------------------------------------------------------------------------------------------------------------------------------------------------------------------------------------------------------------------------------------------------------------------------------------------------------------------------------------------------------------------------------------------|
| Antibodies used | Rabbit anti-FLAG monoclonal antibody (Cell Signaling Technology, 14793S, clone D6W5B, 1:1,000 dilution), mouse anti-GAPDH monoclonal antibody (Proteintech, 60004-1-Ig, clone 1E6D9, 1:2,000 dilution), donkey anti-rabbit IRDye 680RD antibody (LI-COR, 926-68073, 1:20,000 dilution) and goat anti-mouse IRDye 800CW antibody (LI-COR, 926-32210, 1:20,000 dilution).                                                                                                                                                                                                                                                                                                                                                                                                                                                                                                                                                                                                                                                                                                                                                                                                                                                                                                                                                                  |
| Validation      | All antibodies used in this study were validated by the manufacturer. The anti-GAPDH antibody has also been validated by KO/KD. In our experiments we included a negative control of untagged L protein to confirm the specificity of the anti-FLAG antibody (anti-DYKDDDDK Tag) under our experimental conditions.<br>Rabbit anti-FLAG monoclonal antibody <a href="https://www.cellsignal.cn/products/primary-antibodies/dykdddk-tag-d6w5b-rabbit-mab-binds-to-same-epitope-as-sigma-s-anti-flag-m2-antibody/14793">https://www.cellsignal.cn/products/primary-antibodies/dykdddk-tag-d6w5b-rabbit-mab-binds-to-same-epitope-as-sigma-s-anti-flag-m2-antibody/14793</a><br>Mouse anti-GAPDH monoclonal antibody <a href="https://www.ptglab.com/products/GAPDH-Antibody-60004-1-Ig.htm">https://www.ptglab.com/products/GAPDH-Antibody-60004-1-Ig.htm</a><br>Donkey anti-rabbit IRDye 680RD antibody <a href="https://www.licor.com/bio/reagents/irdye-680rd-donkey-anti-rabbit-igg-secondary-antibody">https://www.licor.com/bio/reagents/irdye-680rd-donkey-anti-rabbit-igg-secondary-antibody</a><br>Goat anti-mouse IRDye 800CW antibody <a href="https://www.licor.com/bio/reagents/irdye-800cw-goat-anti-mouse-igg-secondary-antibody">https://www.licor.com/bio/reagents/irdye-800cw-goat-anti-mouse-igg-secondary-antibody</a> |

## Eukaryotic cell lines

Policy information about [cell lines and Sex and Gender in Research](#)

|                                                                   |                                                                                                                                                                                                                                                                                                                                                                                                                                                                                                                            |
|-------------------------------------------------------------------|----------------------------------------------------------------------------------------------------------------------------------------------------------------------------------------------------------------------------------------------------------------------------------------------------------------------------------------------------------------------------------------------------------------------------------------------------------------------------------------------------------------------------|
| Cell line source(s)                                               | The human laryngeal cancer cell line (HEp-2) was purchased from ATCC (CCL-23). The Sf21 insect cell line was purchased from Thermo Fisher Scientific.                                                                                                                                                                                                                                                                                                                                                                      |
| Authentication                                                    | The cells were purchased and routinely maintained. They were not authenticated experimentally for this study.                                                                                                                                                                                                                                                                                                                                                                                                              |
| Mycoplasma contamination                                          | Mycoplasma testing revealed no contamination.                                                                                                                                                                                                                                                                                                                                                                                                                                                                              |
| Commonly misidentified lines (See <a href="#">ICLAC</a> register) | HEp-2 cell line is a HeLa cell contaminant. HEp-2 cells are used routinely in the Fearnls lab as a host for minigenome assays to study viral transcription and replication using the protocol followed in the present work. These cells are used because they are readily transfectable and support efficient transcription and replication by the viral polymerase, the processes that are under investigation in this study. Thus, the contaminating HeLa cells are not expected to influence the results reported here. |

## Plants

|                       |     |
|-----------------------|-----|
| Seed stocks           | N/A |
| Novel plant genotypes | N/A |
| Authentication        | N/A |
